# Supplementary material
Source: Royal Society of Chemistry journal article supplement (doi:10.1039/d6dt01073c)
Supplement: d6dt01073c1.pdf [file d6dt01073c1.pdf]

## “Supporting Information”

### Ligand Design Controls Biomolecule Binding and Cytotoxicity in Platinum(II) Complexes with ONS-Type Tridentate Ligands

Abrar Iskandrani <sup>a</sup>, Dalal Alezi<sup>a</sup>, Ehab M. M. Ali <sup>b,c</sup>, Abdesslem Jedidi <sup>a</sup>,  
Kamelah S. Al-Rashdi <sup>d</sup>, Aleksander Shkurenko <sup>e</sup>, Amjad Aljagthmi <sup>f</sup>, Mohamed Eddaoudi <sup>e</sup>, Bandar  
A. Babgi <sup>a\*</sup>

**Table S1. Important spectroscopic signals of the ligands and their platinum complexes.**

|            | IR spectroscopy<br>(cm <sup>-1</sup> ) |                           | <sup>1</sup> H NMR |             | <sup>13</sup> C NMR    |       |
|------------|----------------------------------------|---------------------------|--------------------|-------------|------------------------|-------|
|            | $\nu(\text{CH}=\text{N})$              | H—C=N<br>(Schiff<br>base) | SCH <sub>3</sub>   | R groups    | H—C=N<br>(Schiff base) | C-S   |
| <b>L1</b>  | 1610                                   | 8.60                      | 2.42               | 3.90        | 161.7                  | 125.3 |
| <b>L2</b>  | 1602                                   | 8.52                      | 2.47               | 3.84        | 166.9                  | 127.1 |
| <b>L3</b>  | 1616                                   | 8.52                      | 2.40               | 3.73        | 161.5                  | 125.0 |
| <b>L4</b>  | 1609                                   | 8.63                      | 2.47               | 4.18 / 1.52 | 161.9                  | 135.2 |
| <b>L5</b>  | 1607                                   | 8.46                      | 2.46               | -           | 159.3                  | 133.5 |
| <b>L6</b>  | 1609                                   | 8.47                      | 2.46               | -           | 160.2                  | 128.0 |
| <b>L7</b>  | 1608                                   | 8.60                      | -                  | 3.96        | 162.9                  | -     |
| <b>L8</b>  | 1632                                   | 8.37                      | 2.15               | 3.91        | 165.9                  | 35.1  |
| <b>L9</b>  | 1615                                   | 8.25                      | 2.16               | 3.83        | 165.0                  | 35.2  |
| <b>Pt1</b> | 1608                                   | 9.62                      | 2.90               | 3.82        | 154.7                  | 129.7 |
| <b>Pt2</b> | 1611                                   | 9.32                      | 2.78               | 3.73        | 167.2                  | 131.9 |
| <b>Pt3</b> | 1626                                   | 9.53                      | 2.79               | 3.67        | 159.0                  | 132.5 |
| <b>Pt4</b> | 1604                                   | 9.62                      | 2.90               | 4.11 / 1.33 | 155.2                  | 129.7 |
| <b>Pt5</b> | 1586                                   | 9.63                      | 2.82               | -           | 159.0                  | 132.5 |
| <b>Pt6</b> | 1596                                   | 9.69                      | 2.91               | -           | 159.0                  | 132.1 |
| <b>Pt7</b> | 1598                                   | 9.38                      | -                  | 3.84        | 153.6                  | -     |
| <b>Pt8</b> | 1602                                   | 8.69                      | 2.55               | 3.74        | 161.4                  | 38.1  |
| <b>Pt9</b> | 1602                                   | 8.51                      | 2.53               | 3.81        | 165.2                  | 38.3  |

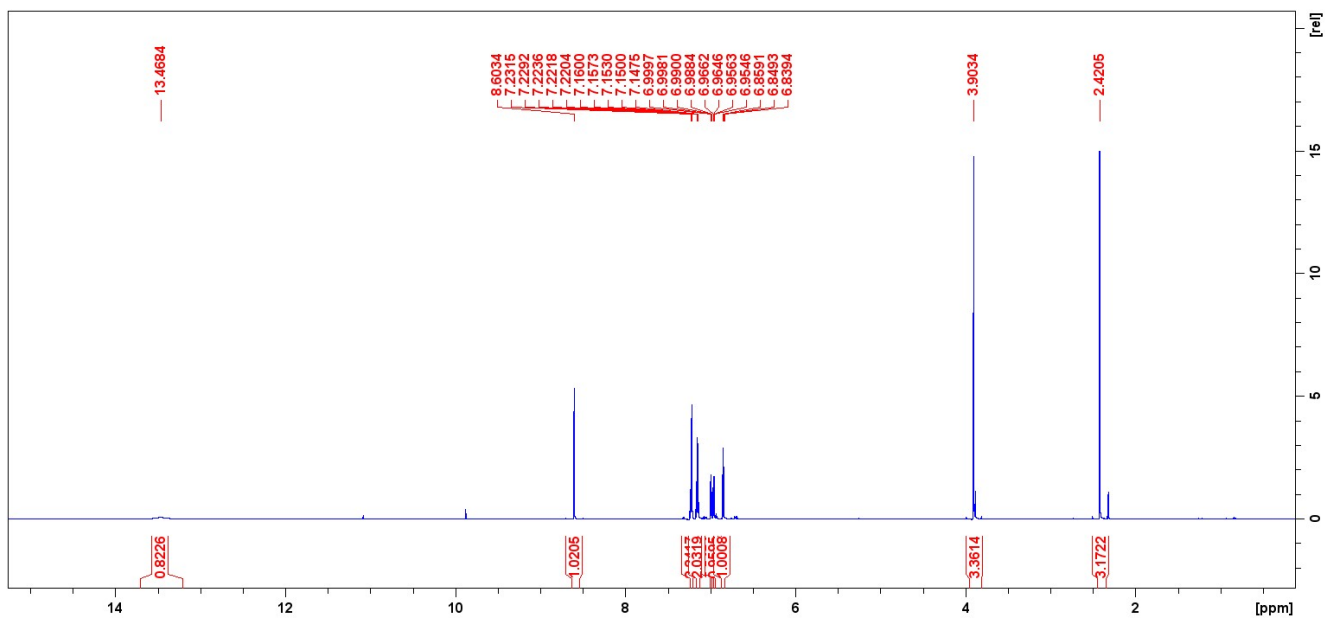

Figure S1.  $^1\text{H}$  NMR spectrum of L1 in  $\text{CDCl}_3$

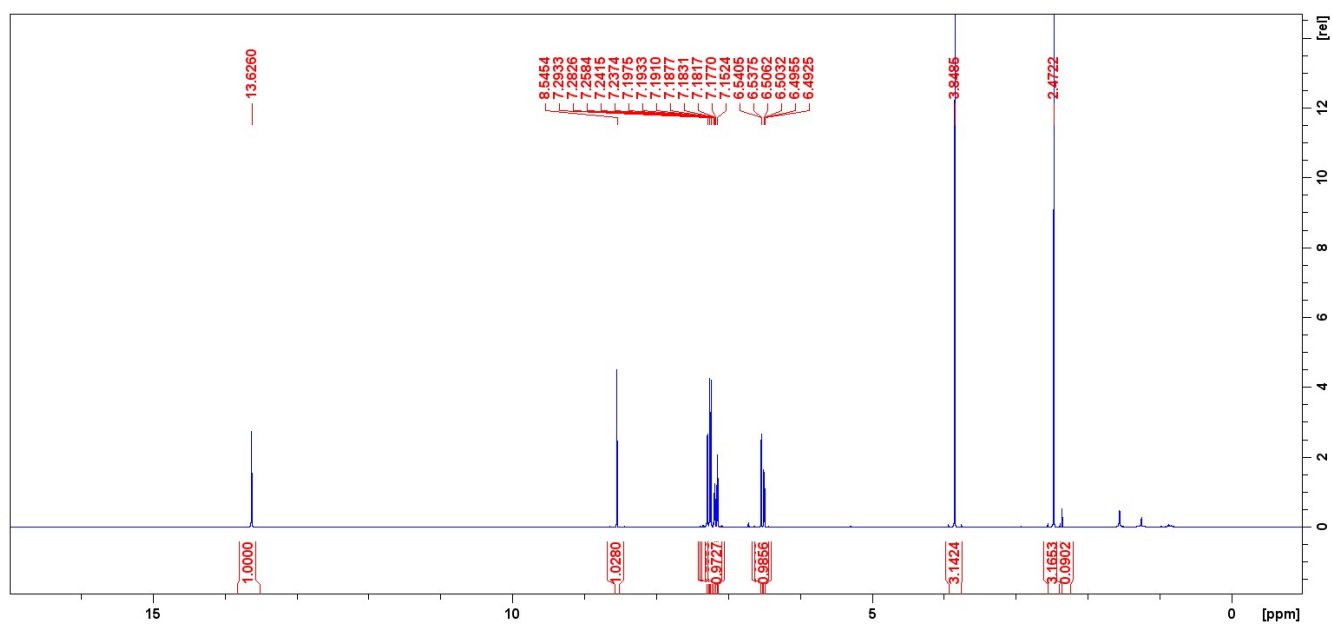

Figure S2.  $^1\text{H}$  NMR spectrum of L2 in  $\text{CDCl}_3$

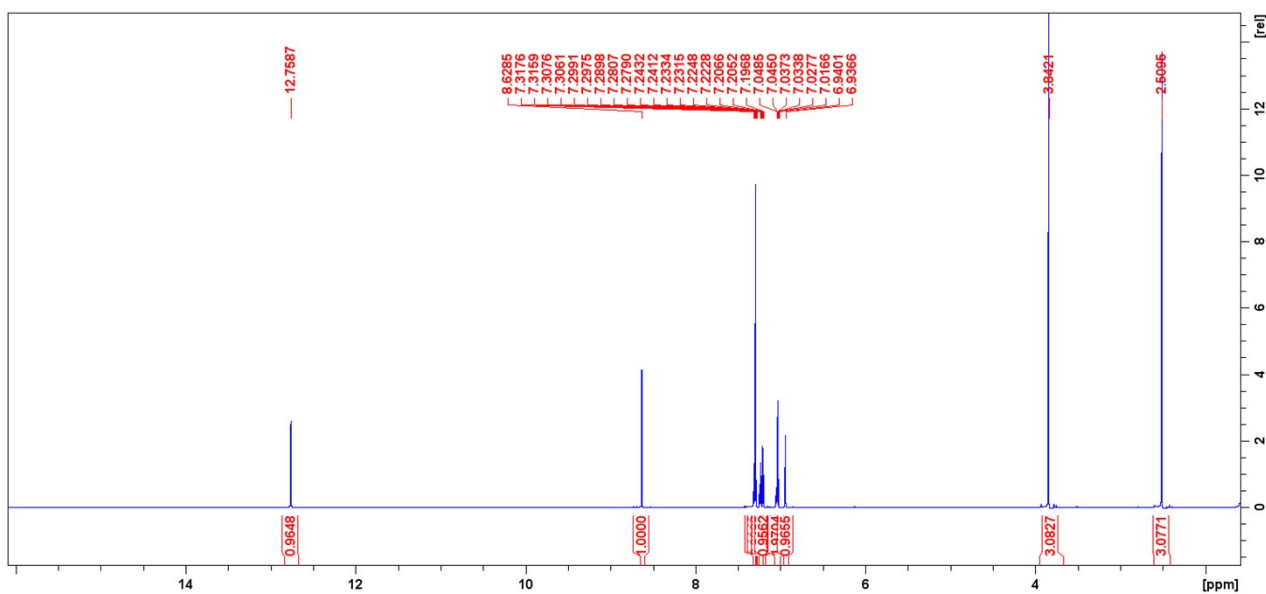

Figure S3.  $^1\text{H}$  NMR spectrum of L3 in  $\text{CDCl}_3$

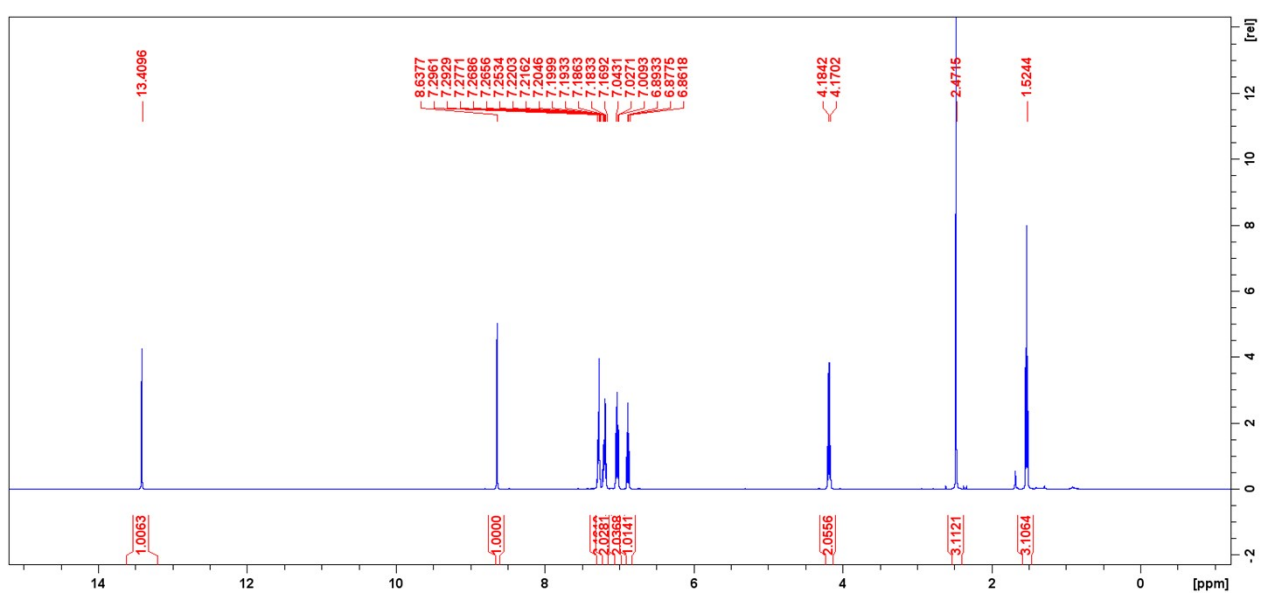

Figure S4.  $^1\text{H}$  NMR spectrum of L4 in  $\text{CDCl}_3$

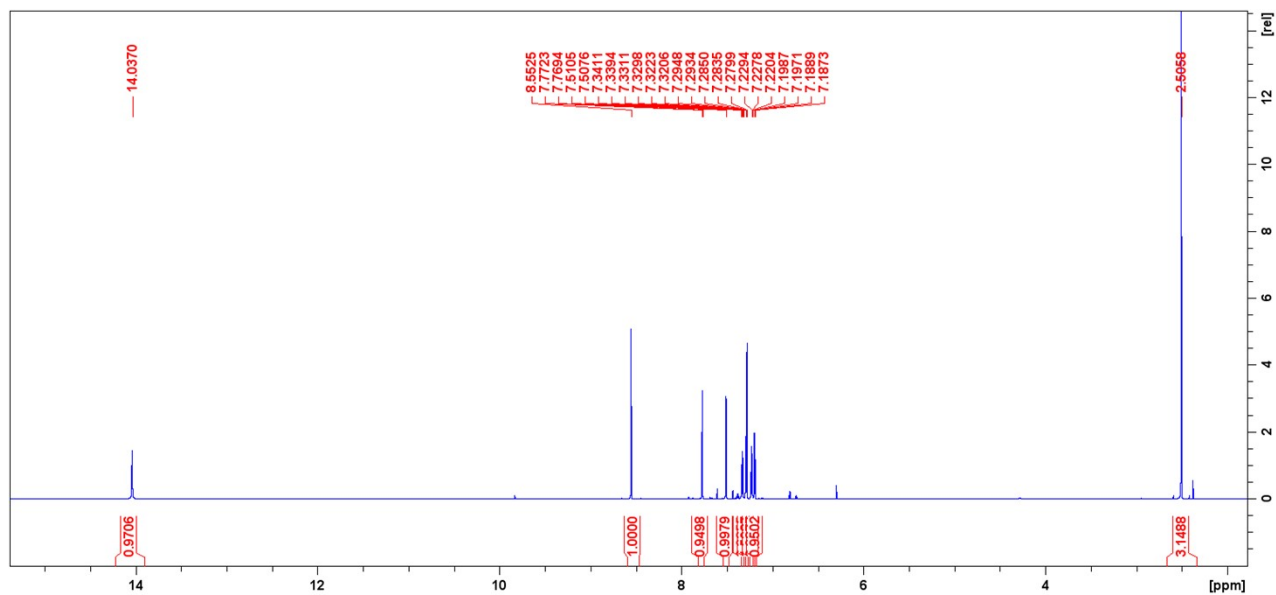

Figure S5.  $^1\text{H}$  NMR spectrum of L5 in  $\text{CDCl}_3$

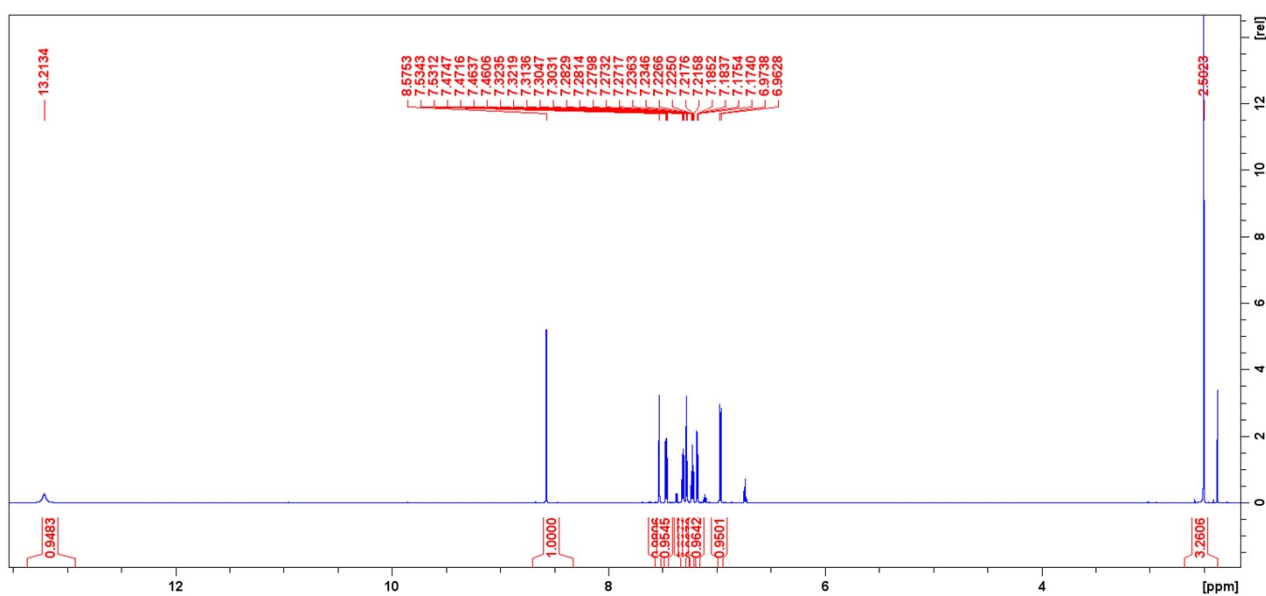

Figure S6.  $^1\text{H}$  NMR spectrum of L6 in  $\text{CDCl}_3$

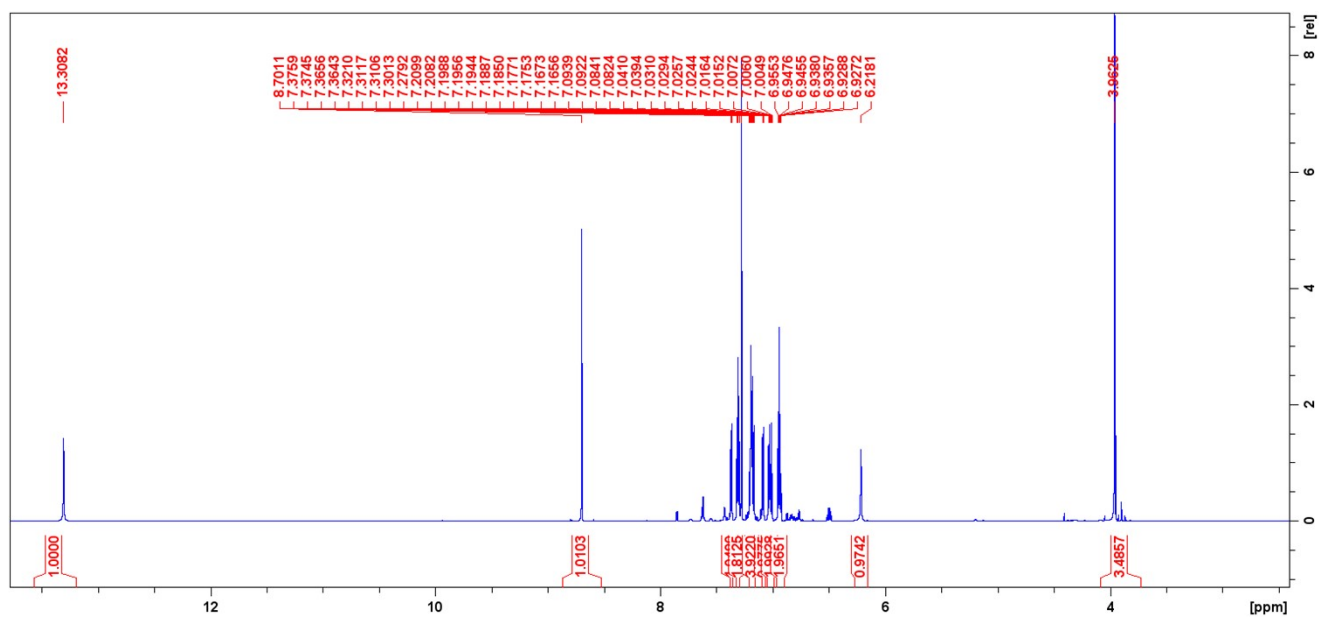

Figure S7.  $^1\text{H}$  NMR spectrum of L7 in  $\text{CDCl}_3$

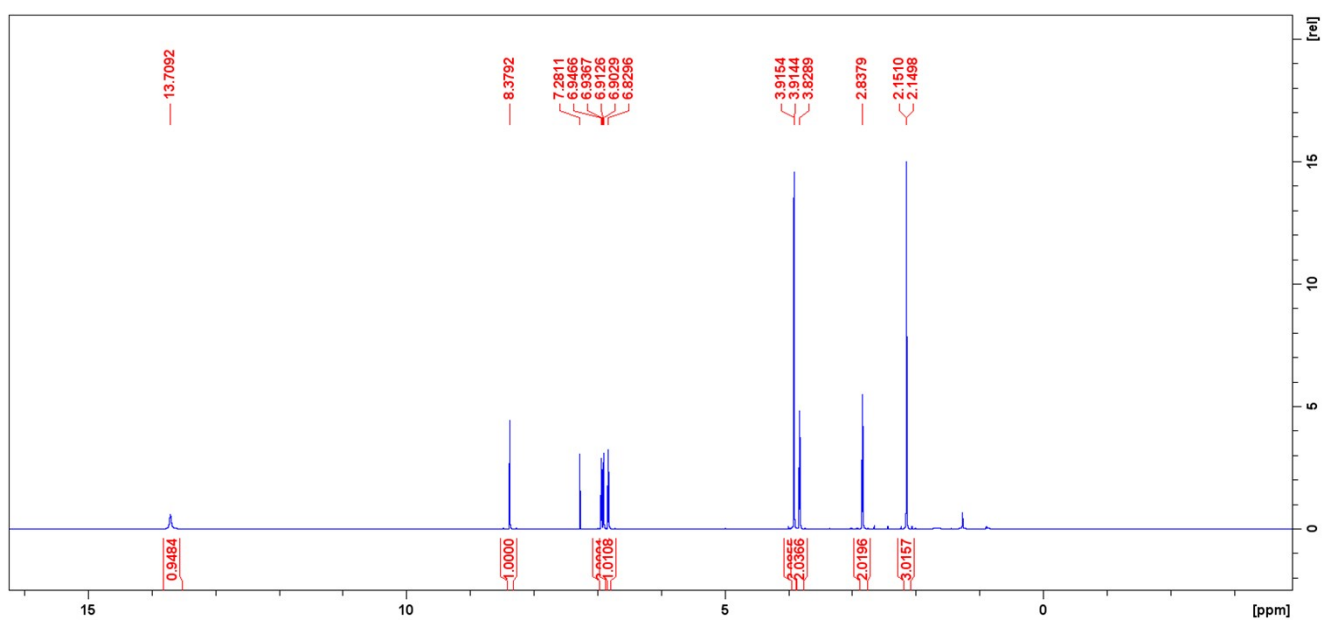

Figure S8.  $^1\text{H}$  NMR spectrum of L8 in  $\text{CDCl}_3$

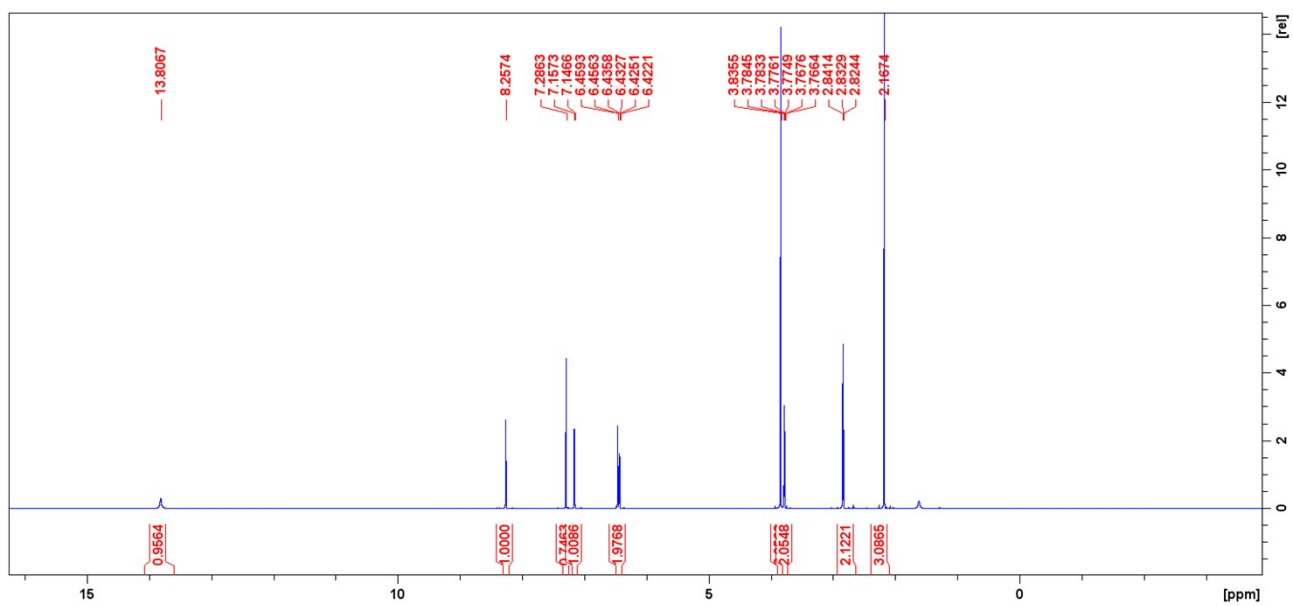

Figure S9.  $^1\text{H}$  NMR spectrum of L9 in  $\text{CDCl}_3$

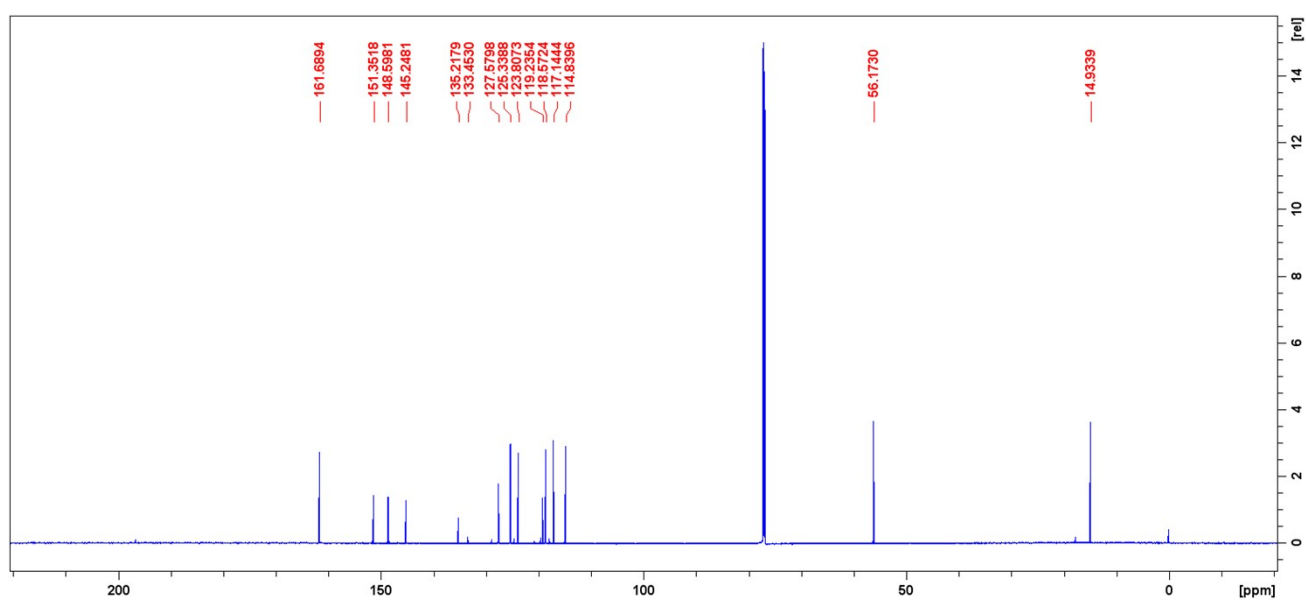

Figure S10.  $^{13}\text{C}$  NMR spectrum of L1 in  $\text{CDCl}_3$

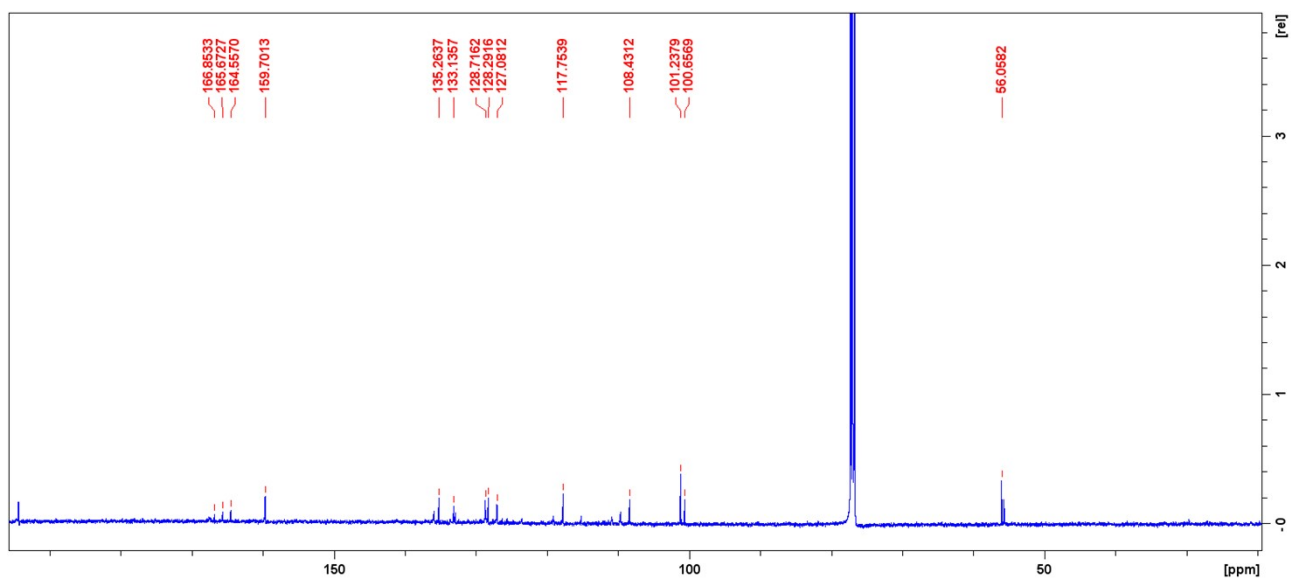

Figure S11.  $^{13}\text{C}$  NMR spectrum of L2 in  $\text{CDCl}_3$

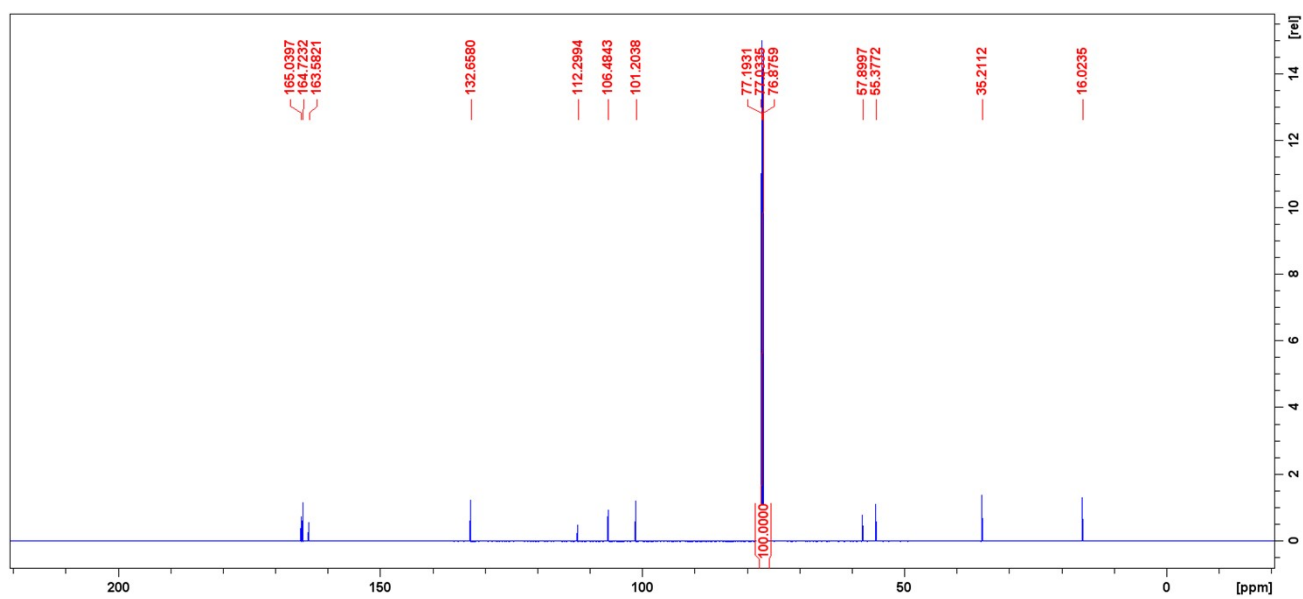

Figure S12.  $^{13}\text{C}$  NMR spectrum of L3 in  $\text{CDCl}_3$

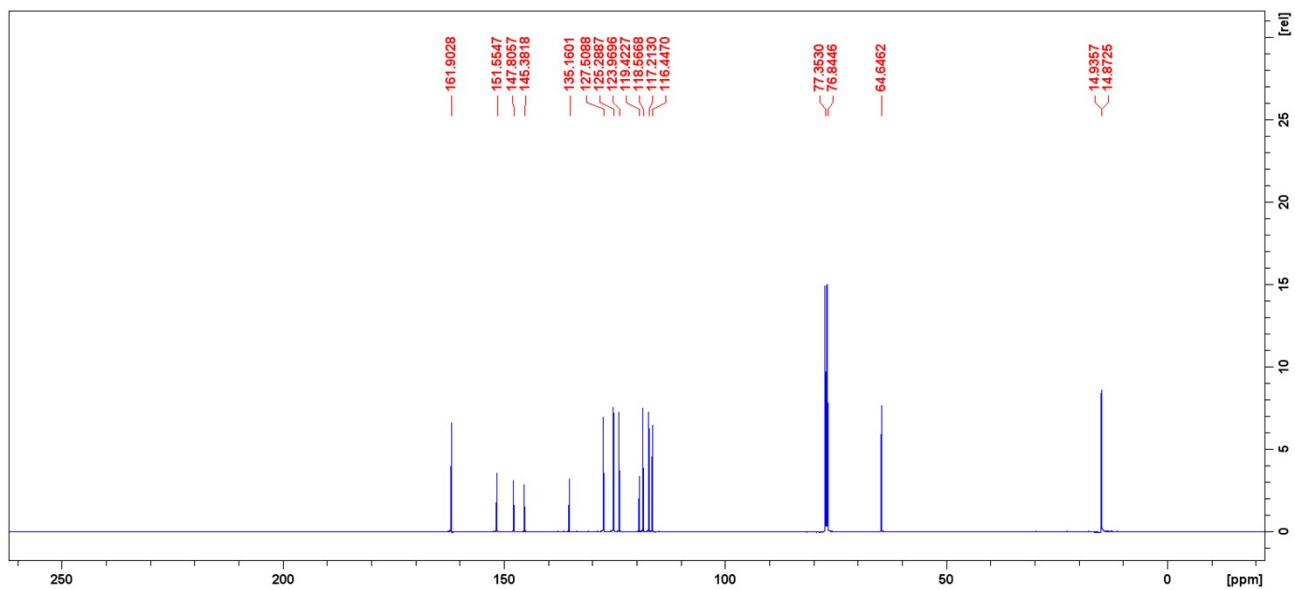

Figure S13.  $^{13}\text{C}$  NMR spectrum of L4 in  $\text{CDCl}_3$

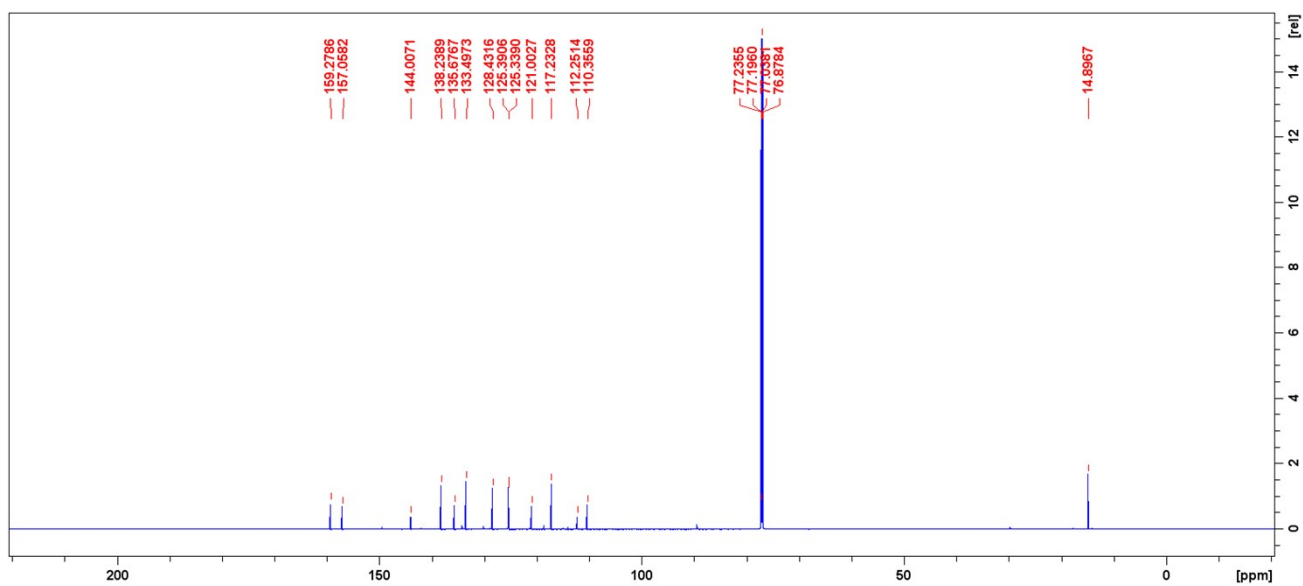

Figure S14.  $^{13}\text{C}$  NMR spectrum of L5 in  $\text{CDCl}_3$

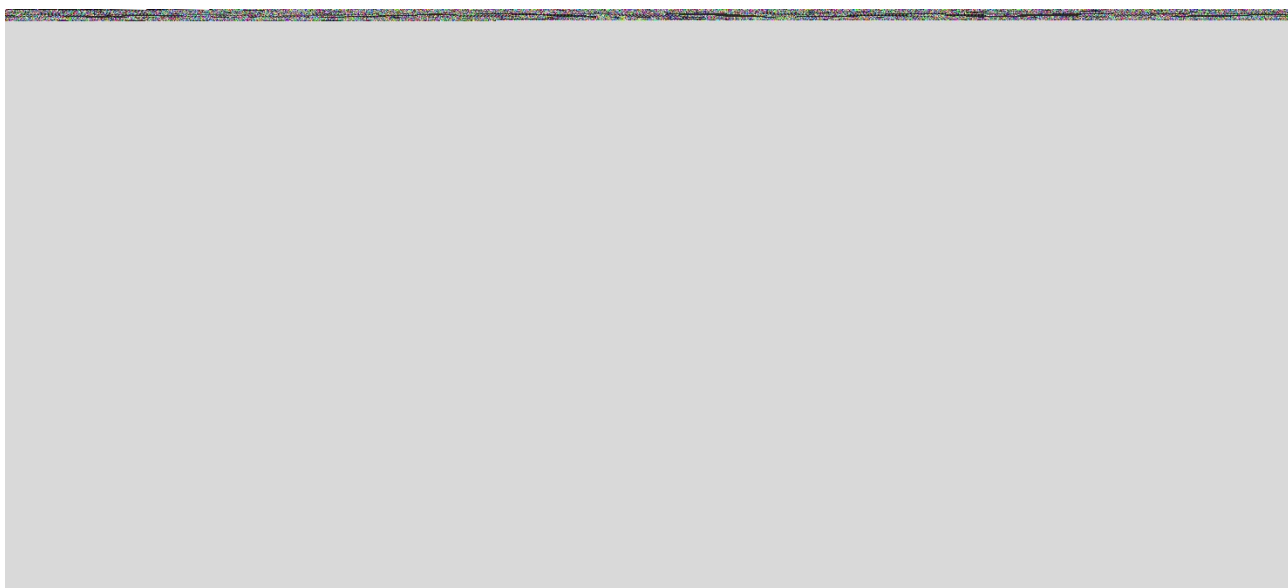

Figure S15.  $^{13}\text{C}$  NMR spectrum of L6 in  $\text{CDCl}_3$

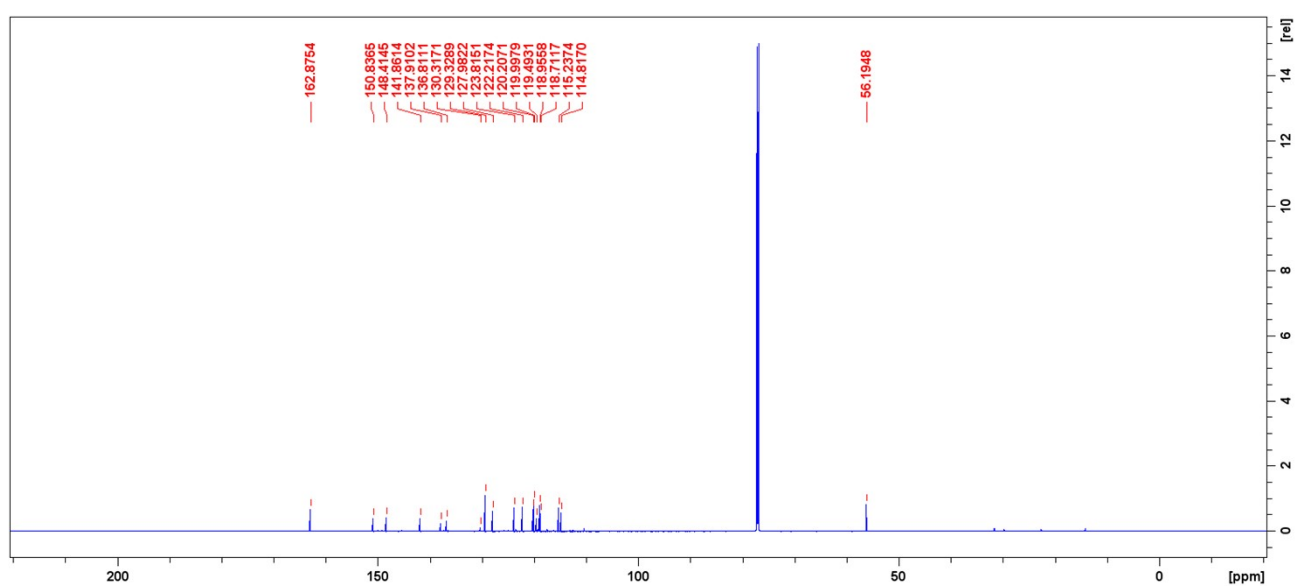

Figure S16.  $^{13}\text{C}$  NMR spectrum of L7 in  $\text{CDCl}_3$

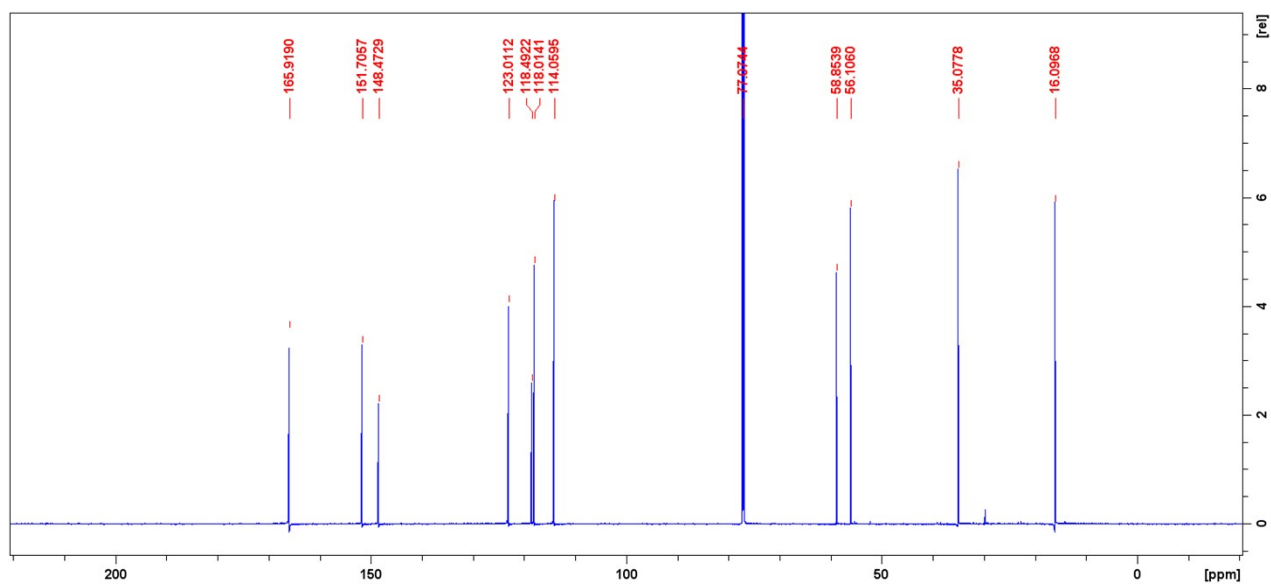

Figure S17.  $^{13}\text{C}$  NMR spectrum of L8 in  $\text{CDCl}_3$

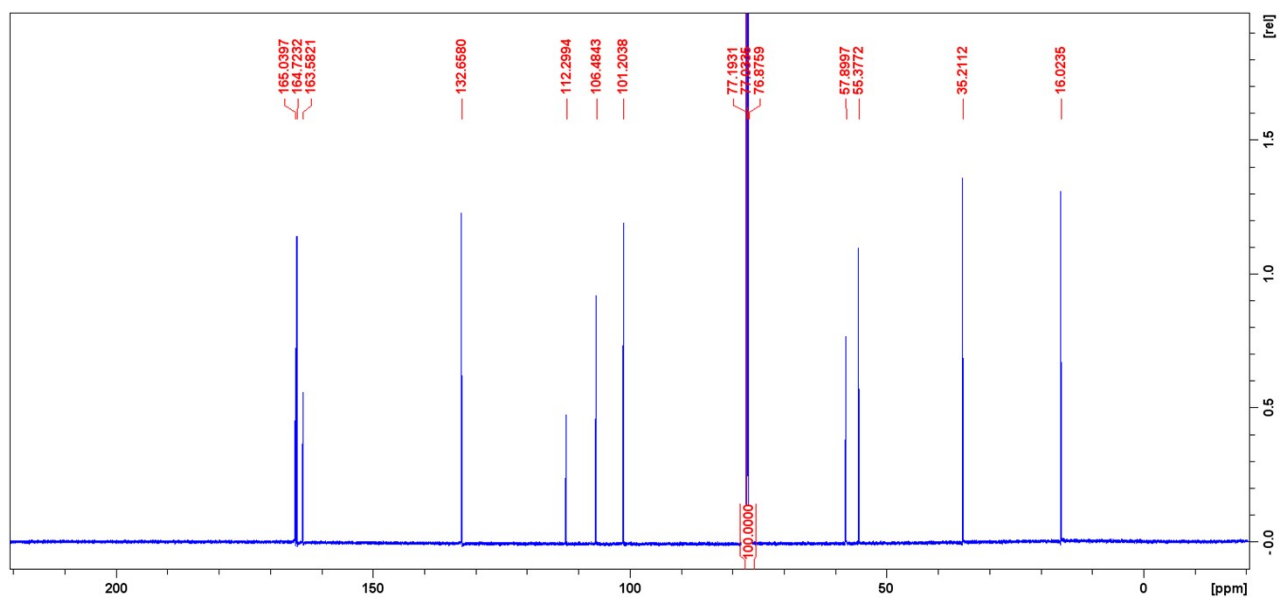

Figure S18.  $^{13}\text{C}$  NMR spectrum of L9 in  $\text{CDCl}_3$

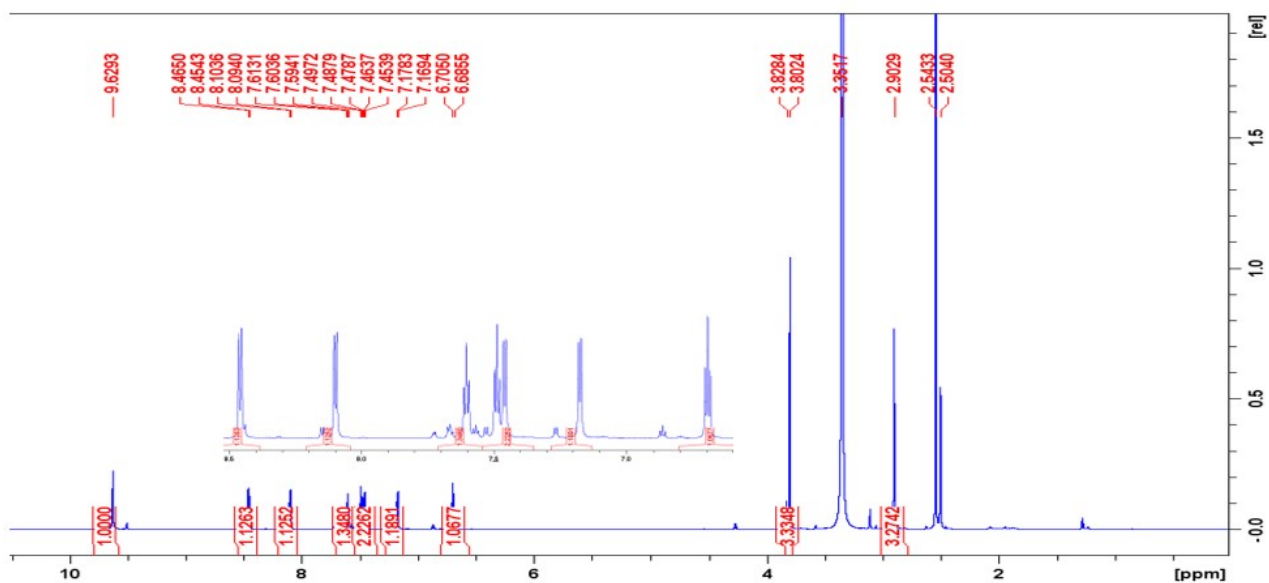

Figure S19.  $^1\text{H}$  NMR spectrum of Pt1 in  $\text{DMSO-}d_6$ .

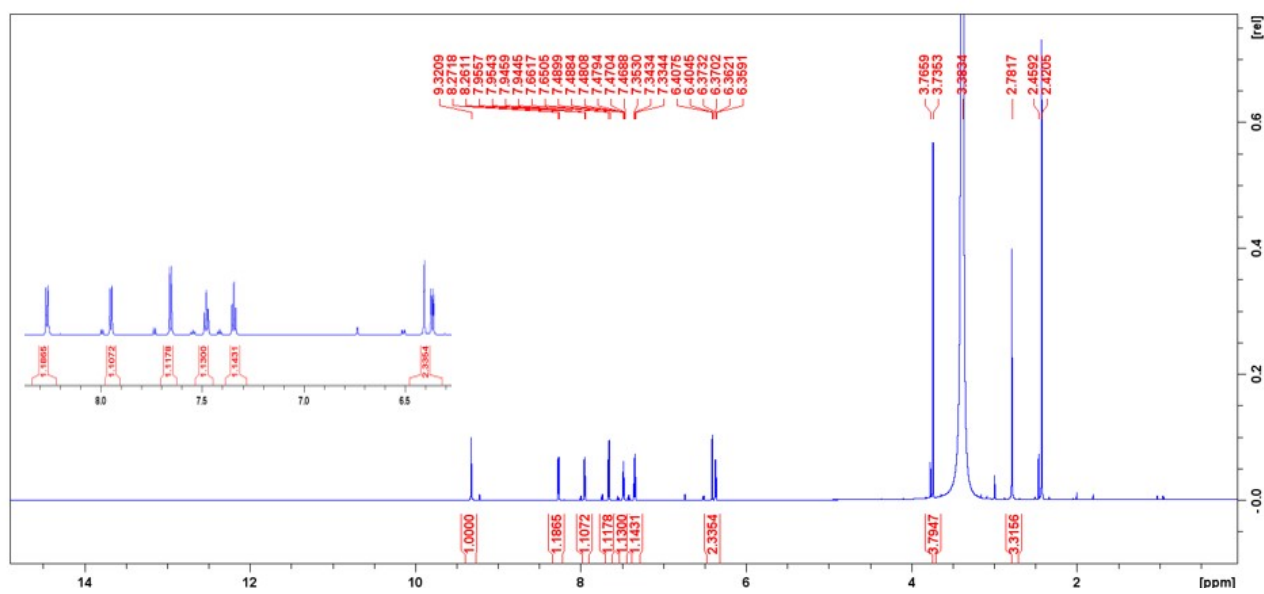

Figure S20.  $^1\text{H}$  NMR spectrum of Pt2 in  $\text{DMSO-}d_6$ .

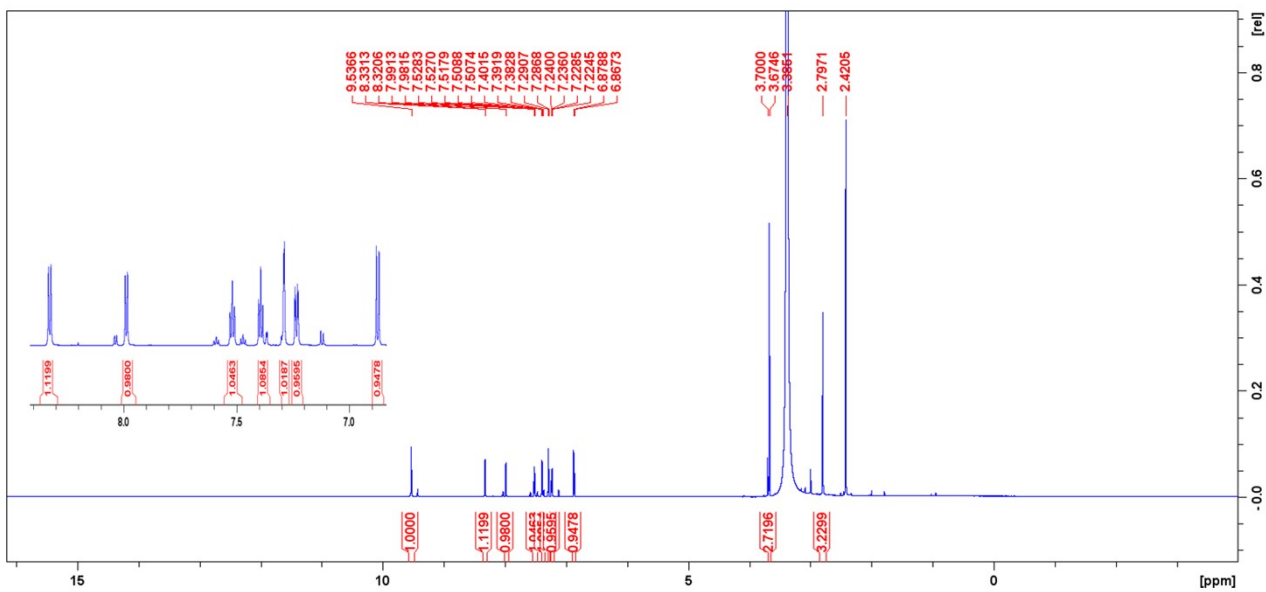

Figure S21.  $^1\text{H}$  NMR spectrum of Pt3 in  $\text{DMSO-}d^6$ .

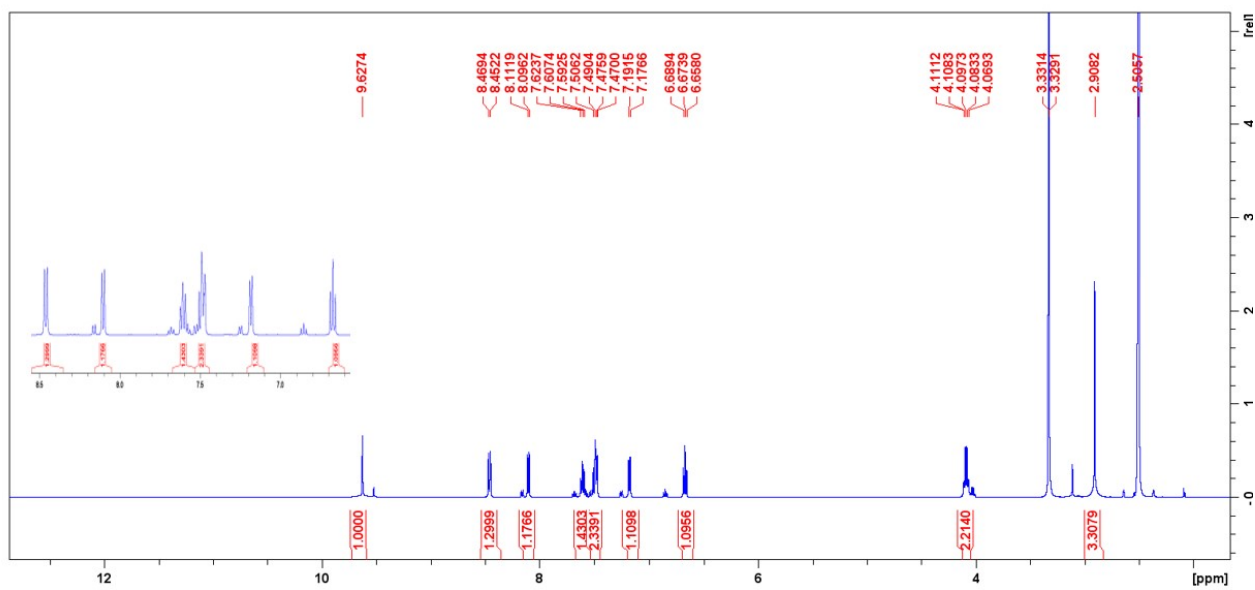

Figure S22.  $^1\text{H}$  NMR spectrum of Pt4 in  $\text{DMSO-}d^6$ .

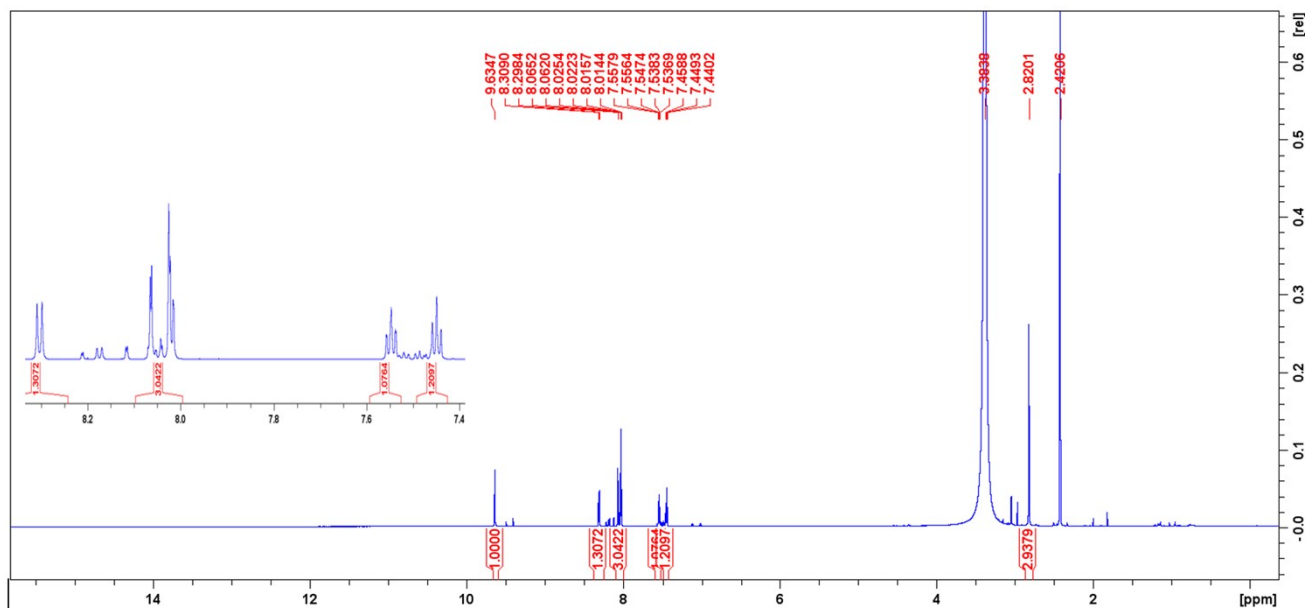

Figure 23.  $^1\text{H}$  NMR spectrum of Pt5 in  $\text{DMSO-}d^6$ .

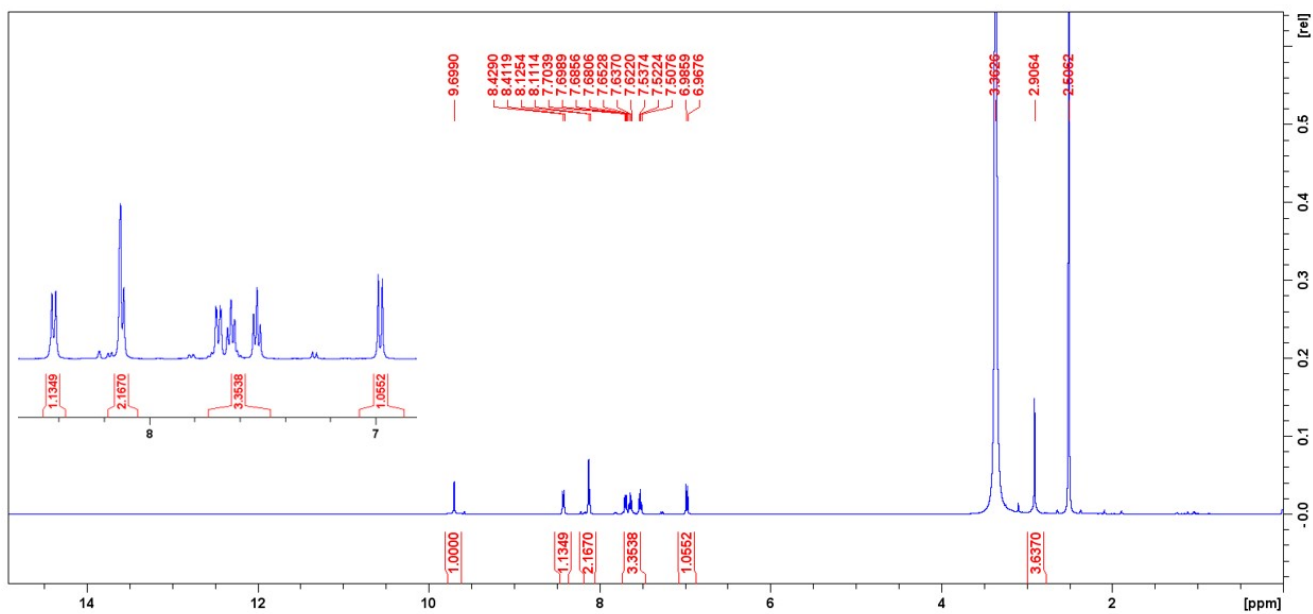

Figure 24.  $^1\text{H}$  NMR spectrum of Pt6 in  $\text{DMSO-}d^6$ .

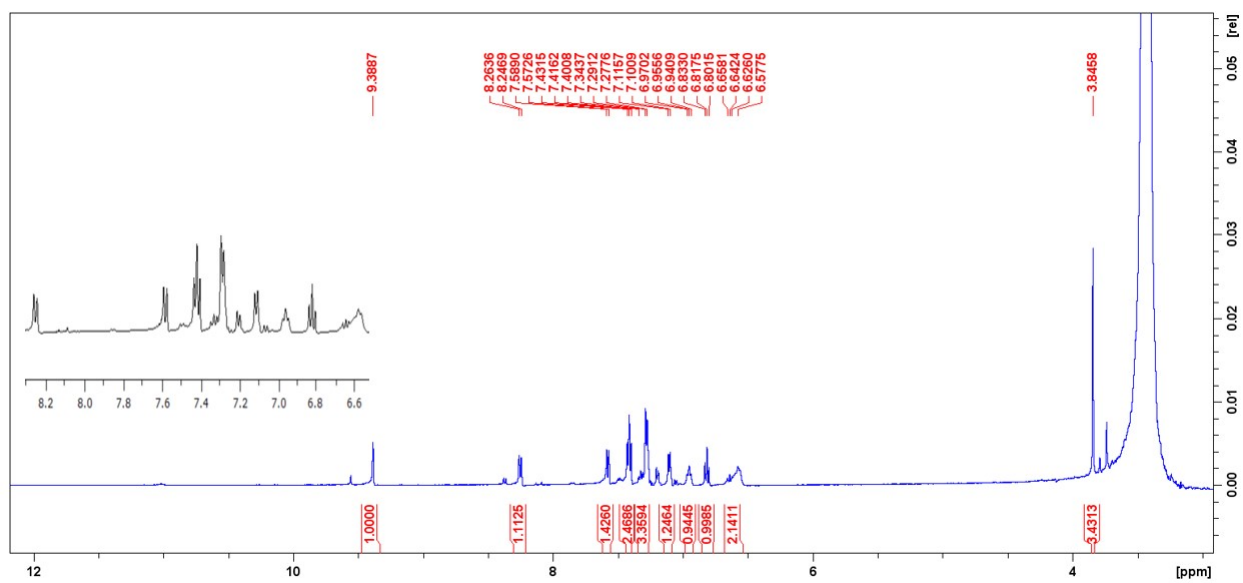

Figure 25.  $^1\text{H}$  NMR spectrum of Pt7 in  $\text{DMSO-}d^6$ .

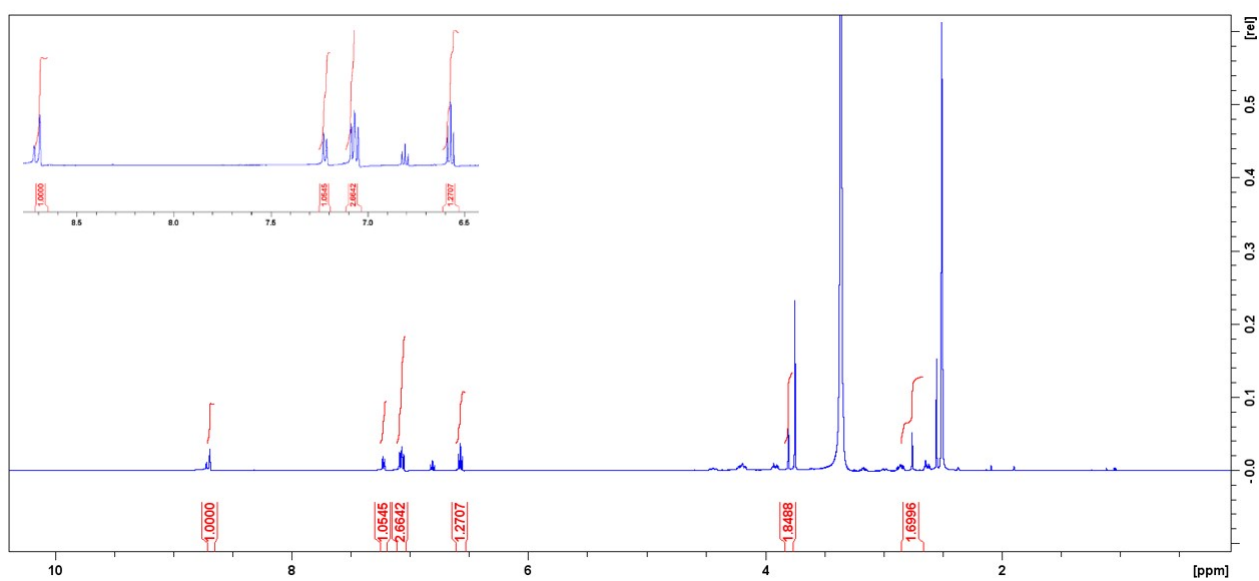

Figure 26.  $^1\text{H}$  NMR spectrum of Pt8 and  $\text{DMSO-adduct}$  in  $\text{DMSO-}d^6$ .

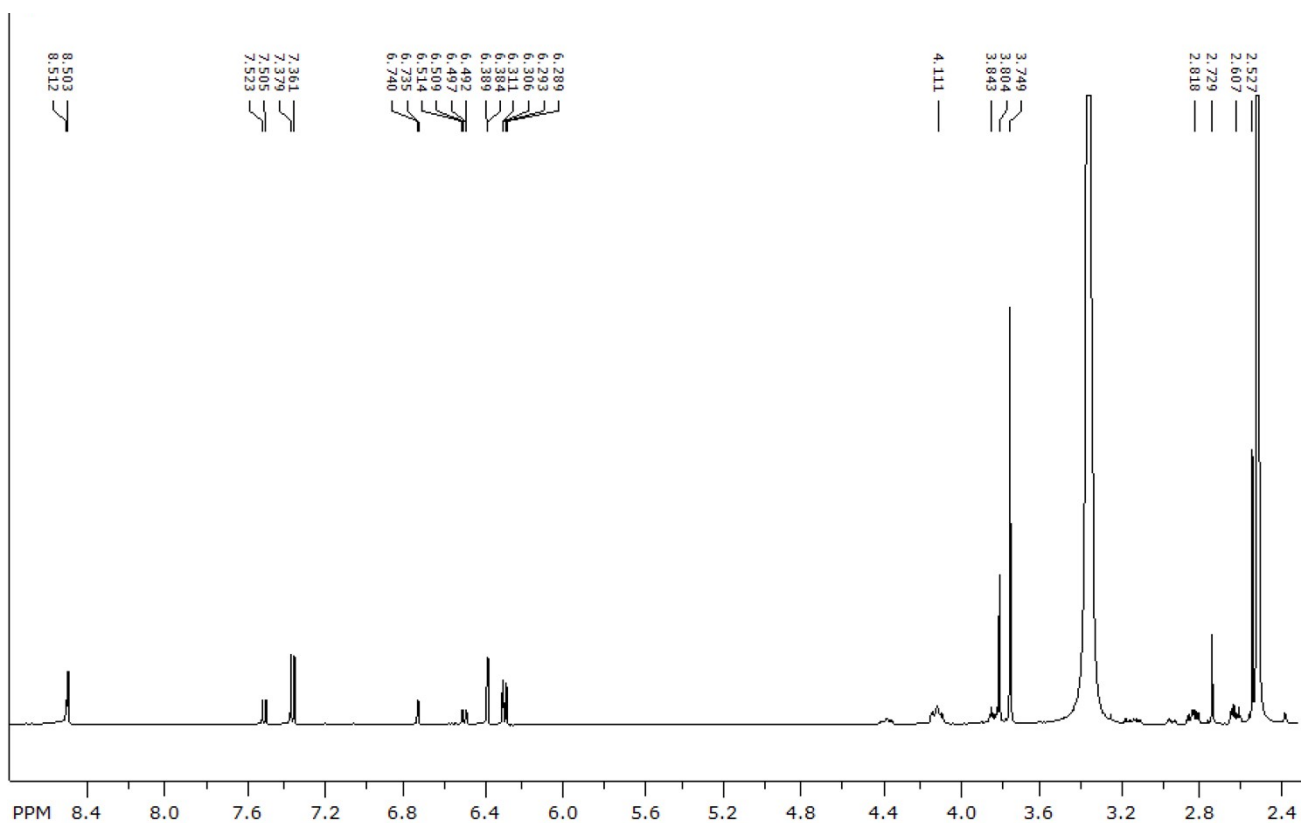

Figure 27.  $^1\text{H}$  NMR spectrum of Pt9 and DMSO-adduct in  $\text{DMSO-}d_6$ .

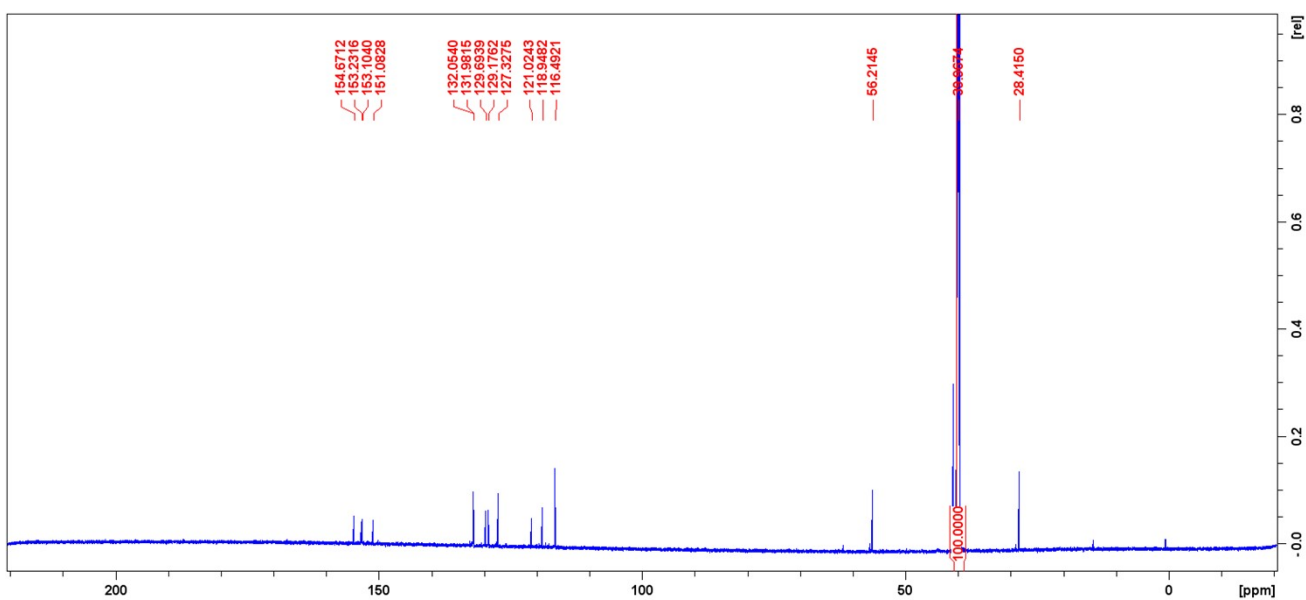

Figure 28.  $^{13}\text{C}$  NMR spectrum of Pt1 in  $\text{DMSO-}d_6$ .

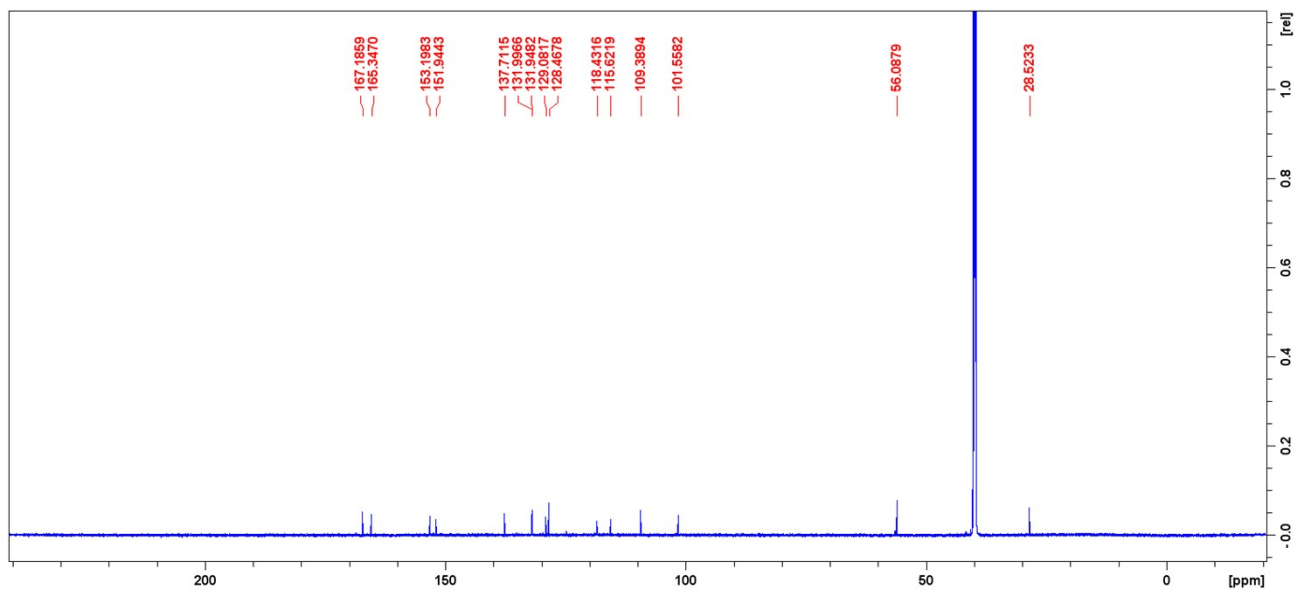

Figure 29.  $^{13}\text{C}$  NMR spectrum of Pt2 in DMSO- $d_6$ .

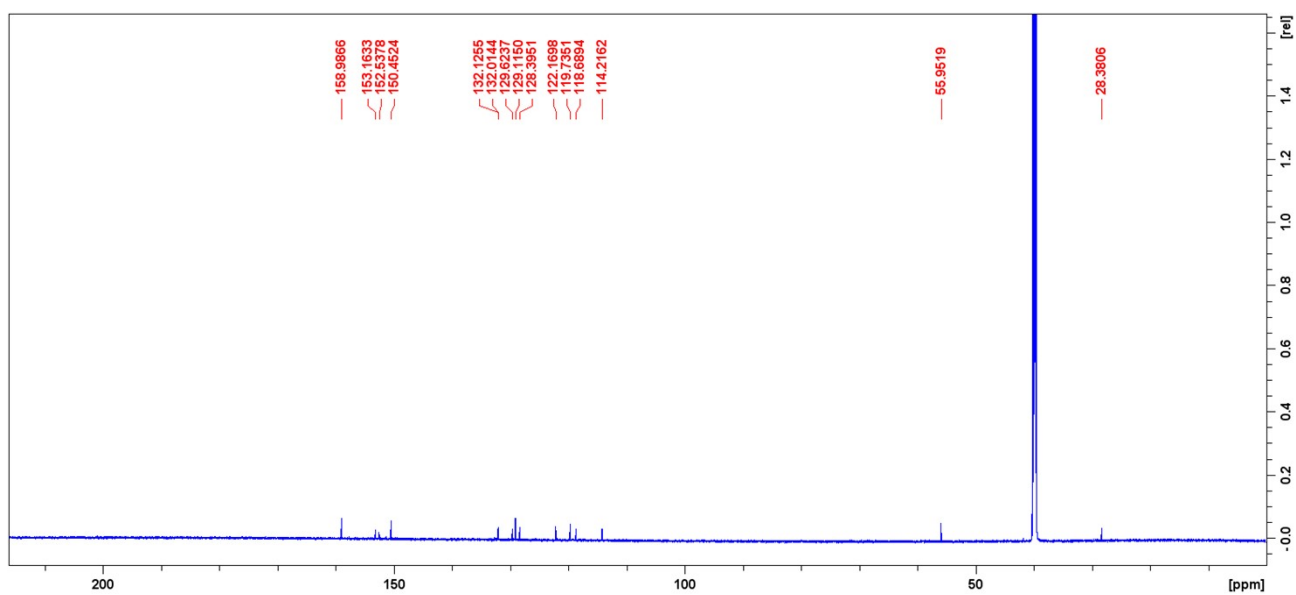

Figure 30.  $^{13}\text{C}$  NMR spectrum of Pt3 in DMSO- $d_6$ .

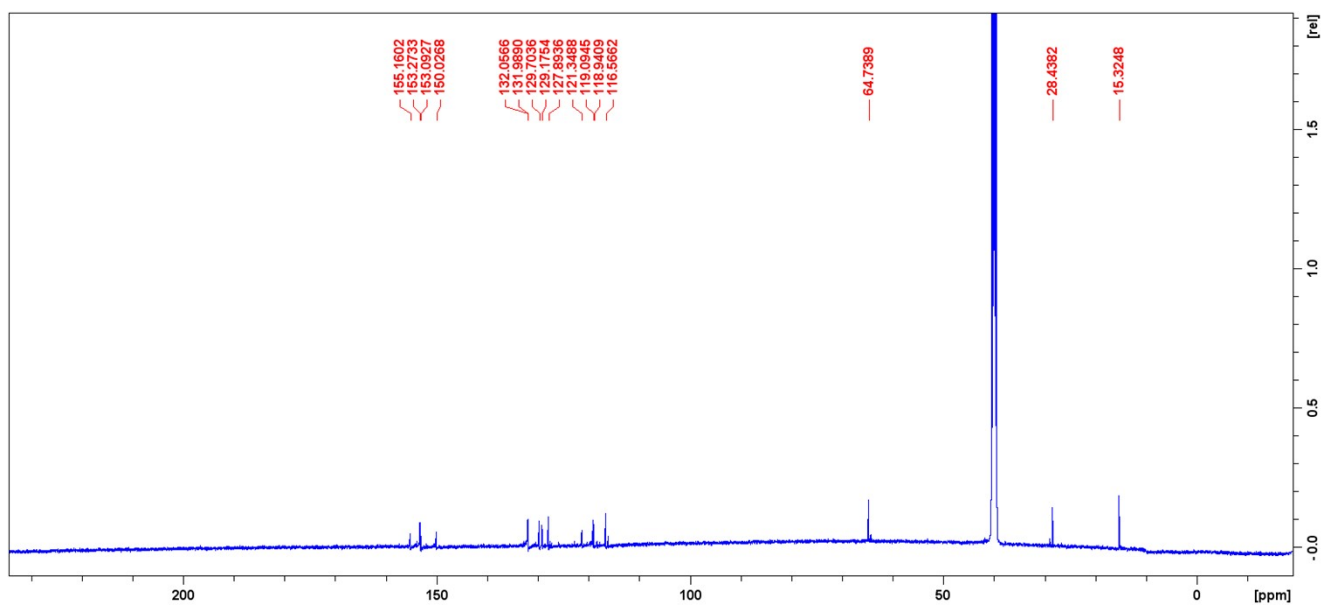

Figure 31.  $^{13}\text{C}$  NMR spectrum of Pt4 in  $\text{DMSO-}d^6$ .

pivot = 39.85 ppm Phase increment = 0.20 ph0 = -1.61 ph1 = 0.80

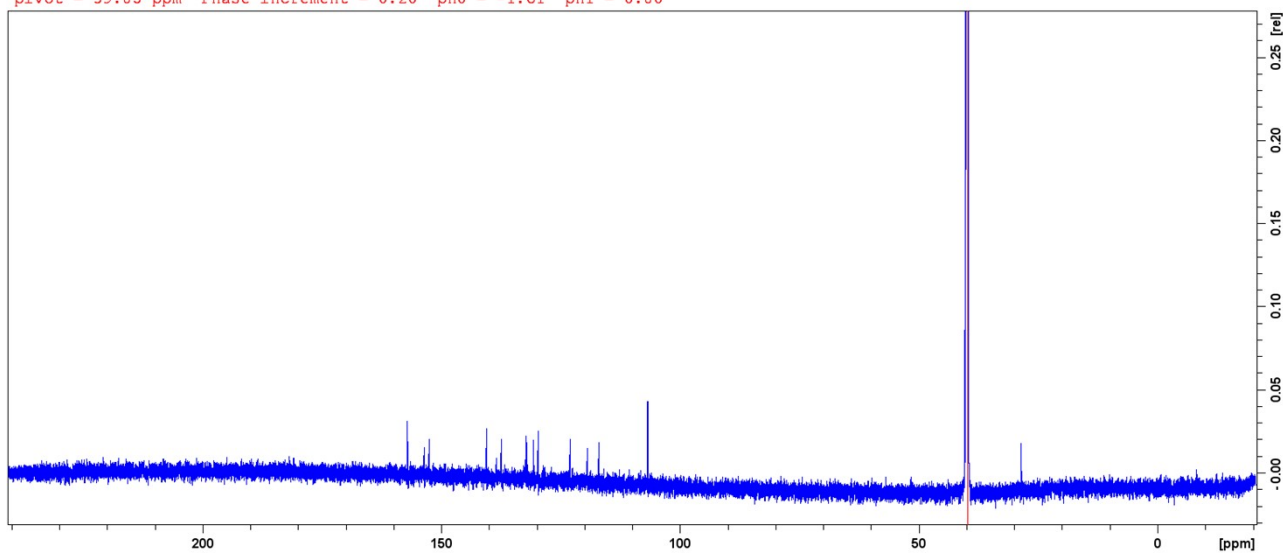

Figure 32.  $^{13}\text{C}$  NMR spectrum of Pt5 in  $\text{DMSO-}d^6$ .

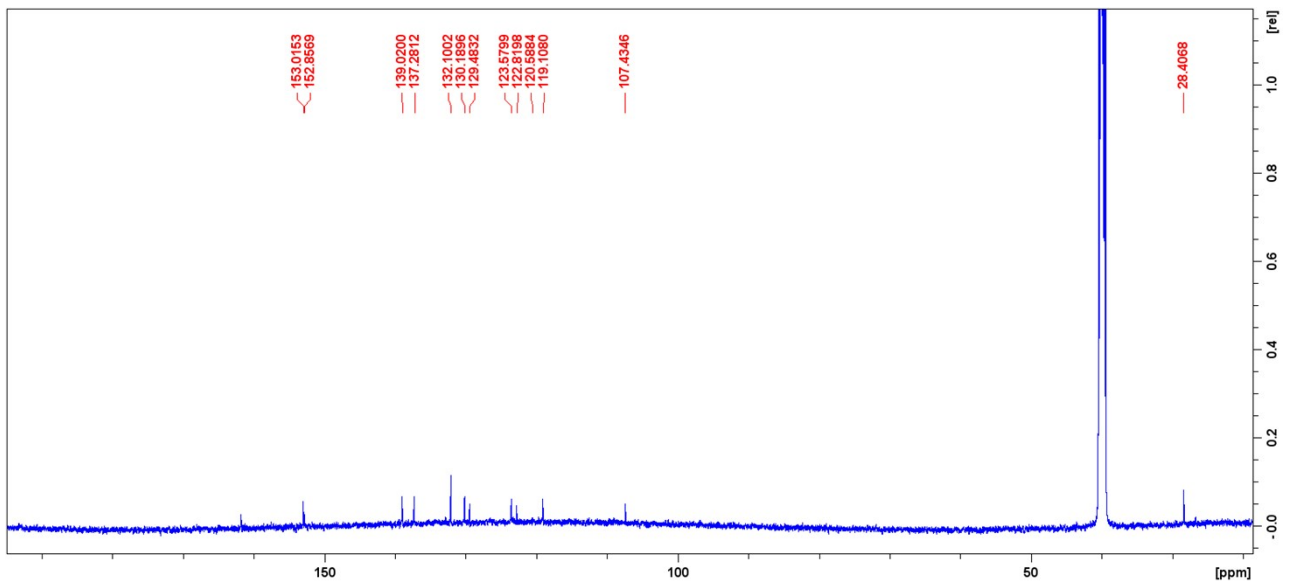

Figure 33.  $^{13}\text{C}$  NMR spectrum of Pt6 in  $\text{DMSO-}d_6$ .

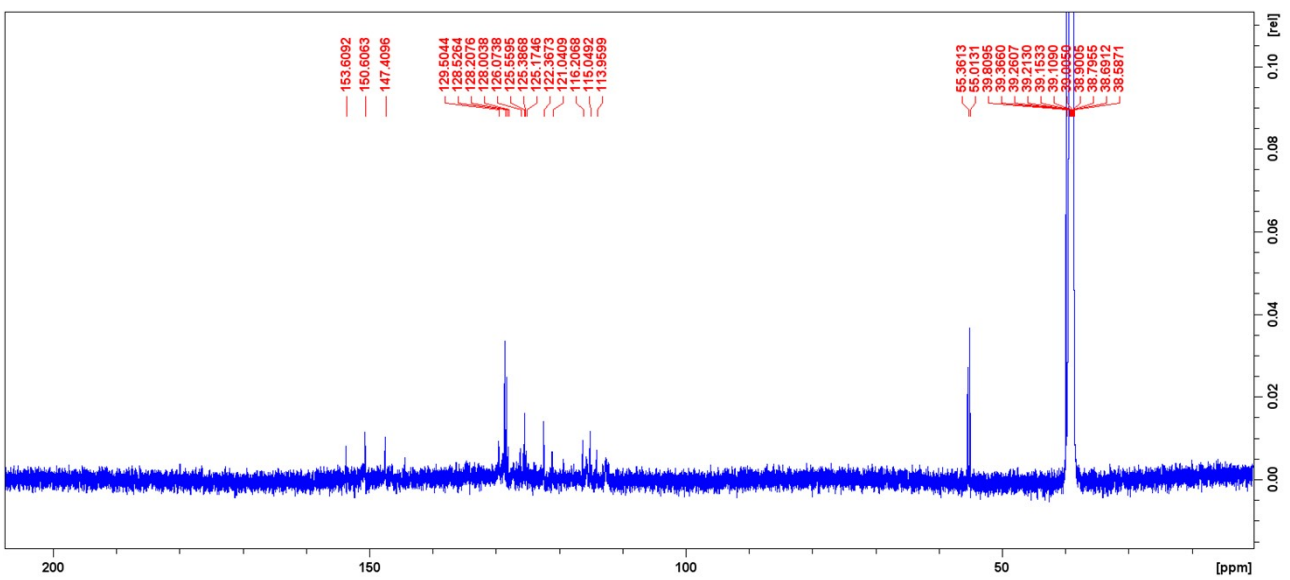

Figure 34.  $^{13}\text{C}$  NMR spectrum of Pt7 in  $\text{DMSO-}d_6$ .

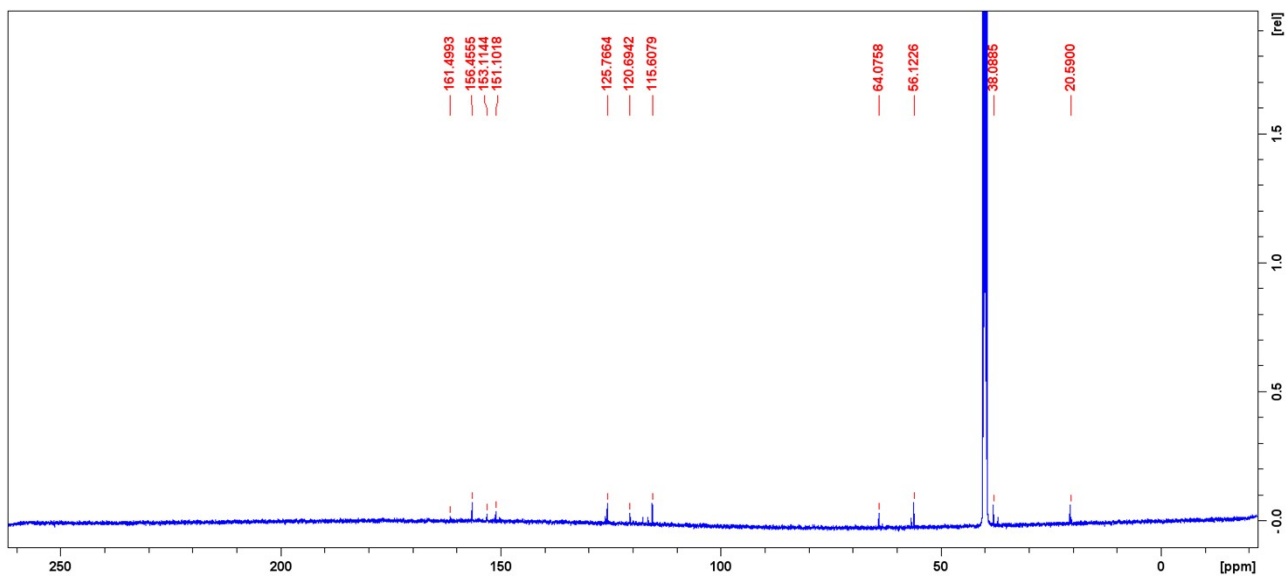

Figure 35.  $^{13}\text{C}$  NMR spectrum of Pt8 in  $\text{DMSO-}d_6$ .

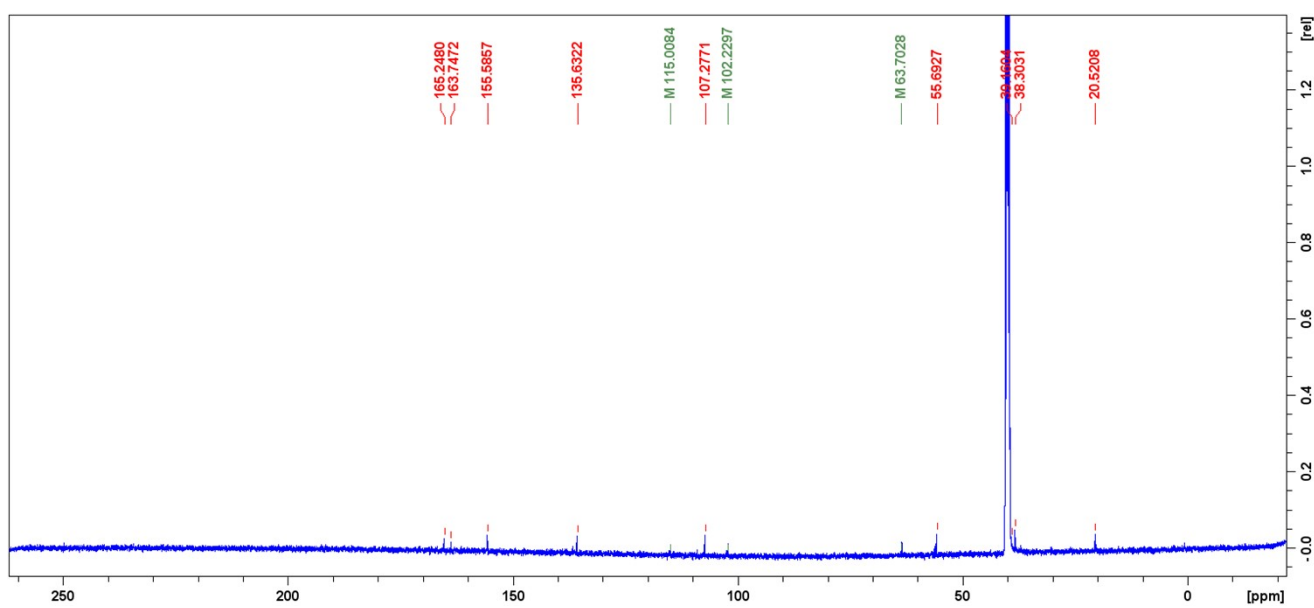

Figure 36.  $^{13}\text{C}$  NMR spectrum of Pt9 in  $\text{DMSO-}d_6$ .

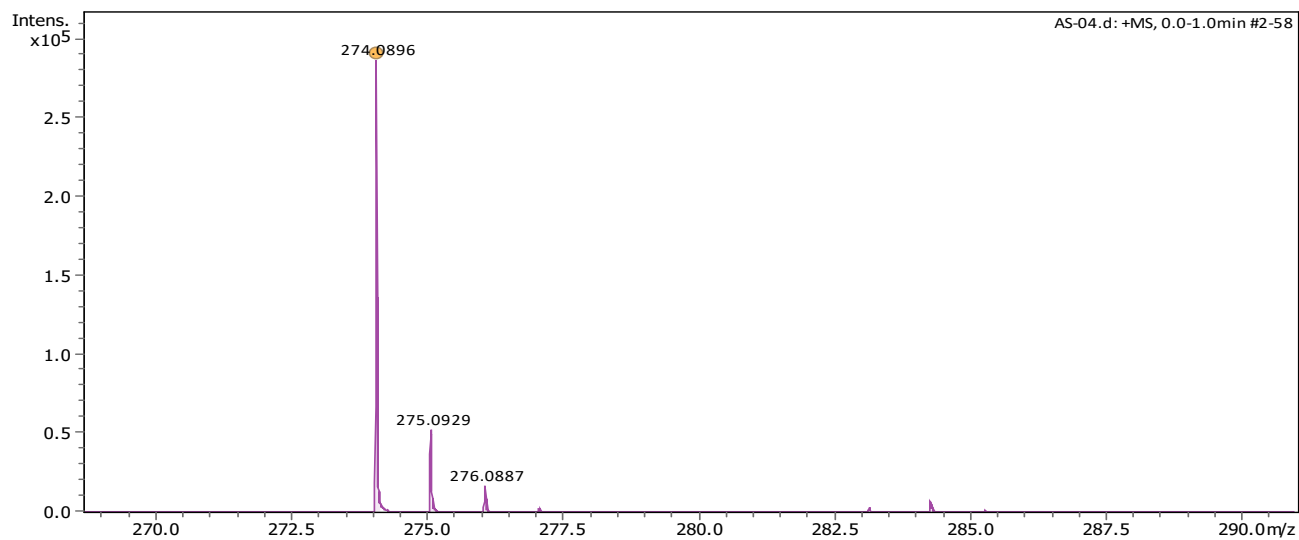

**Figure 37. Mass spectrum of L1**

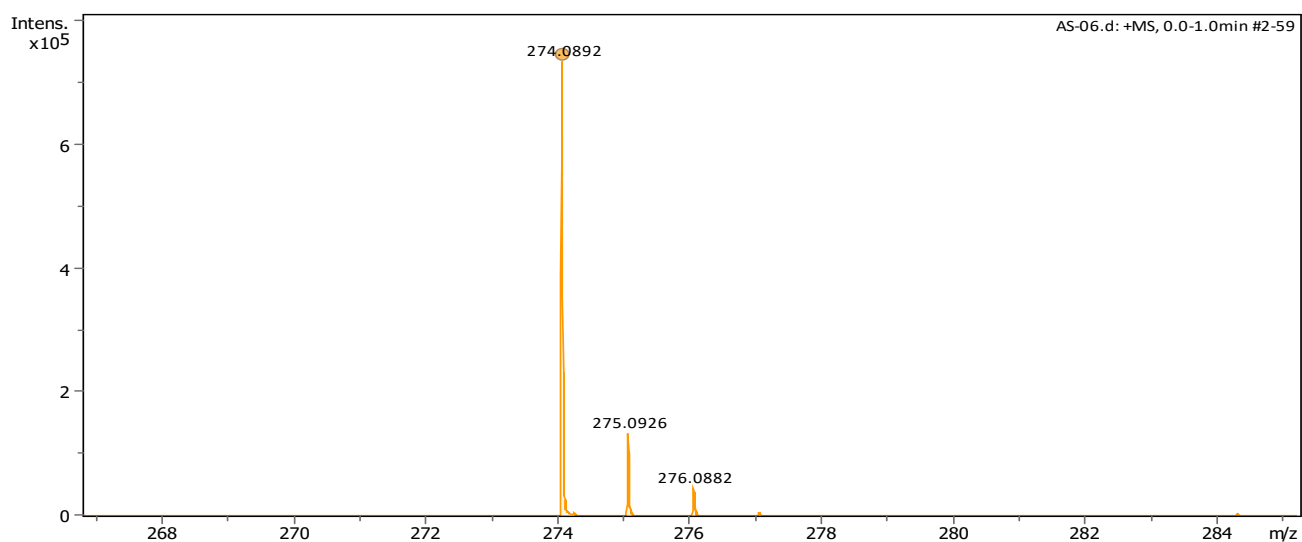

**Figure 37. Mass spectrum of L2**

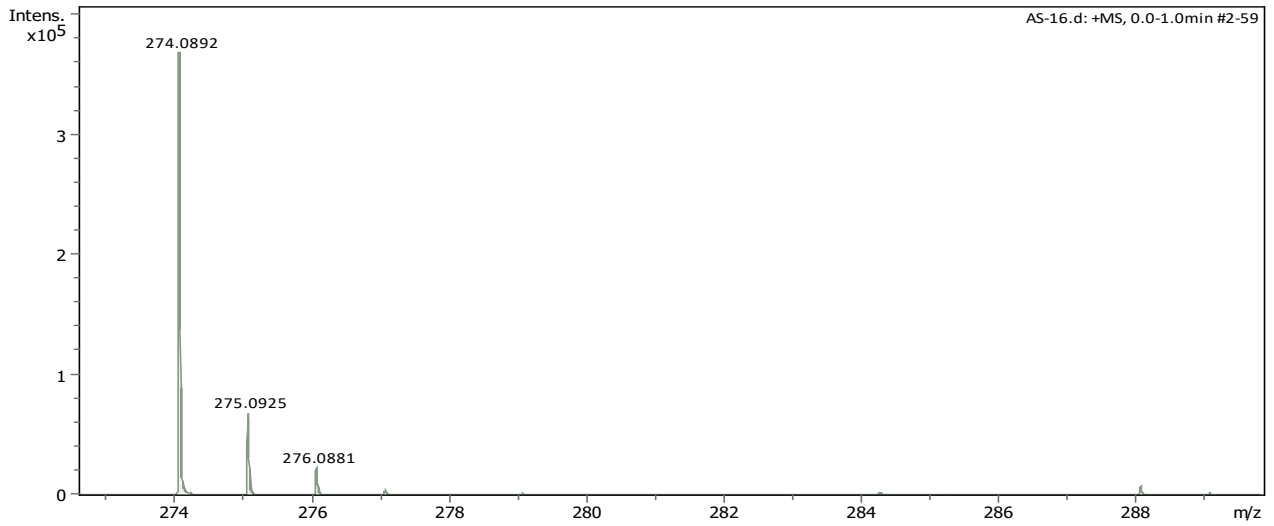

**Figure 39. Mass spectrum of L3**

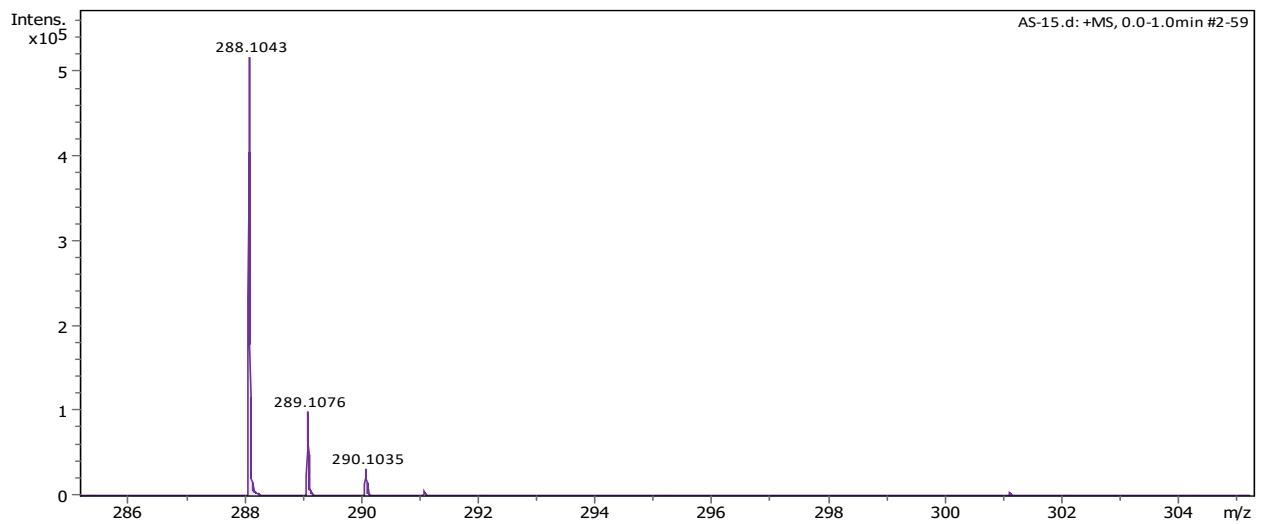

**Figure 40. Mass spectrum of L4**

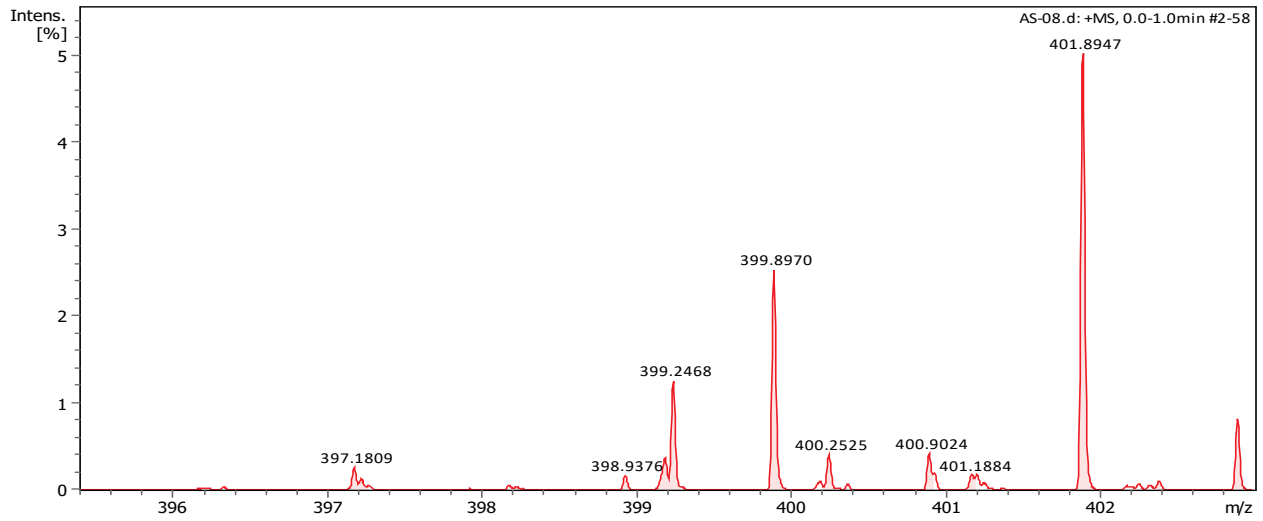

**Figure 41. Mass spectrum of L5**

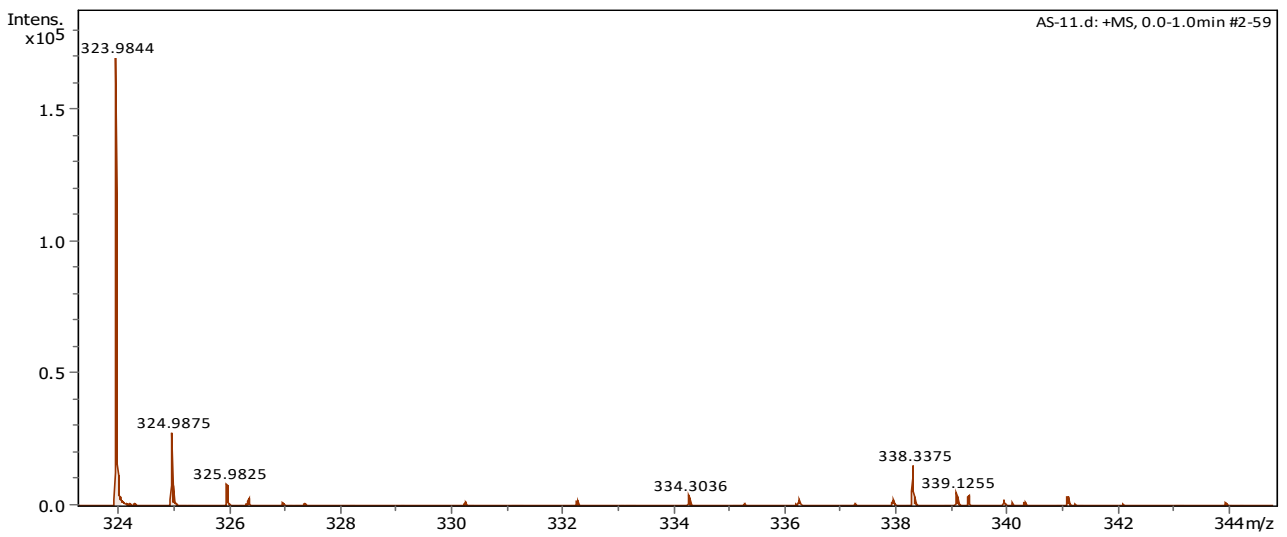

**Figure 42. Mass spectrum of L6**

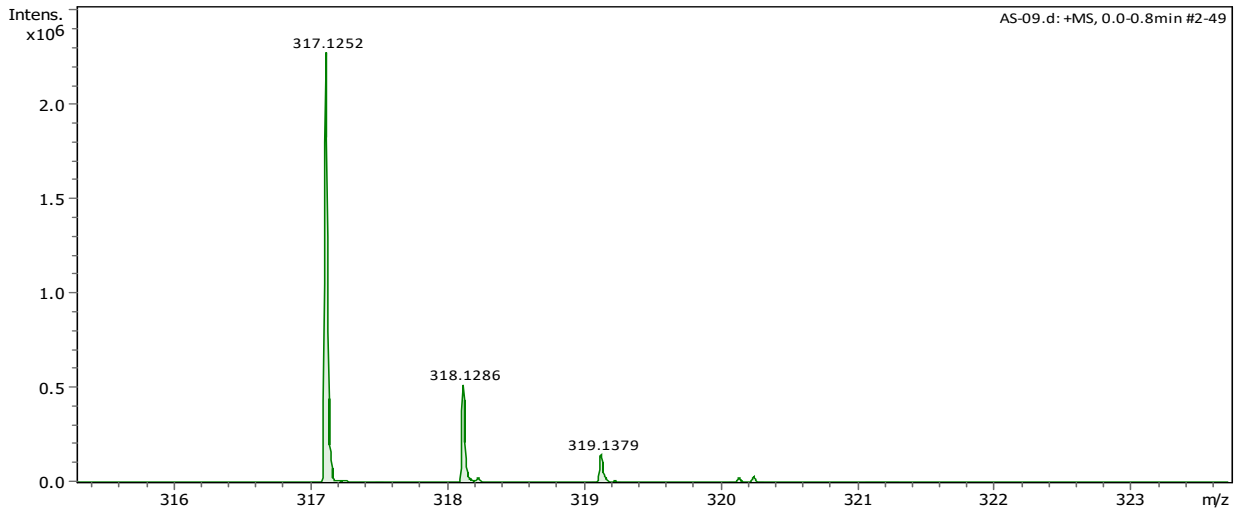

**Figure 43. Mass spectrum of L7**

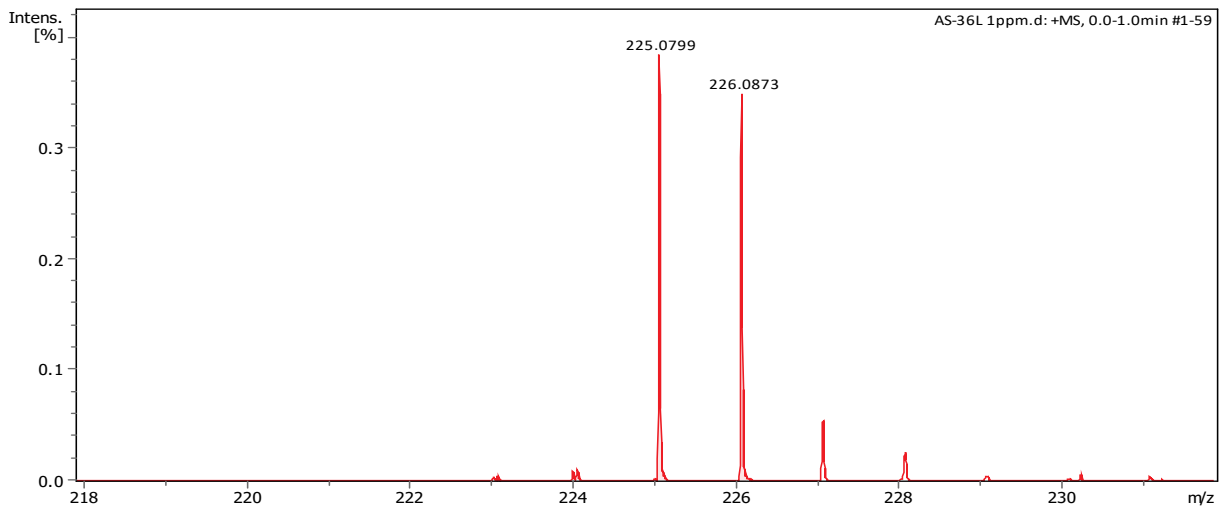

**Figure 44. Mass spectrum of L8**

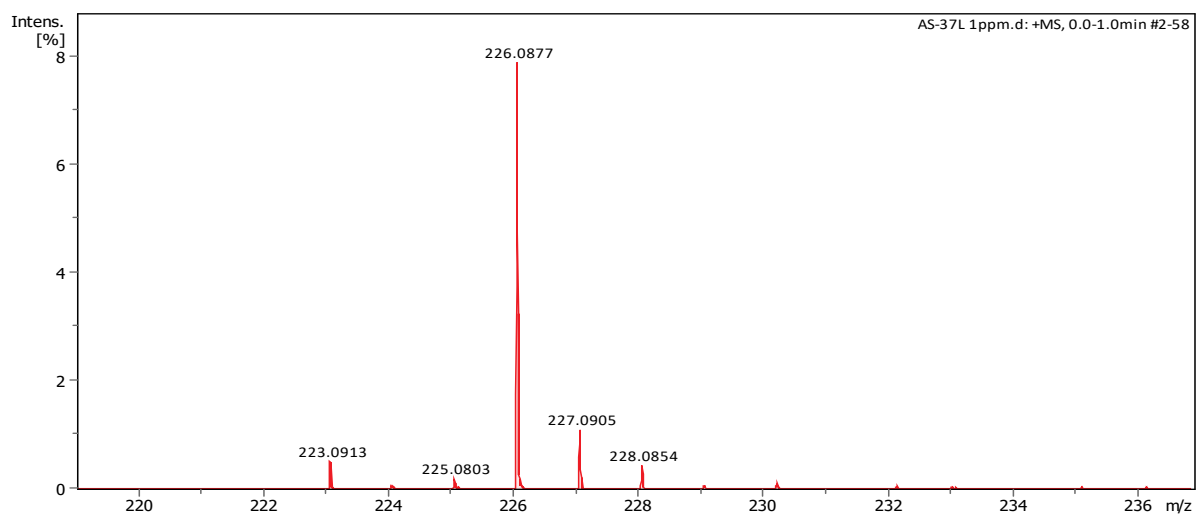

**Figure 45. Mass spectrum of L9**

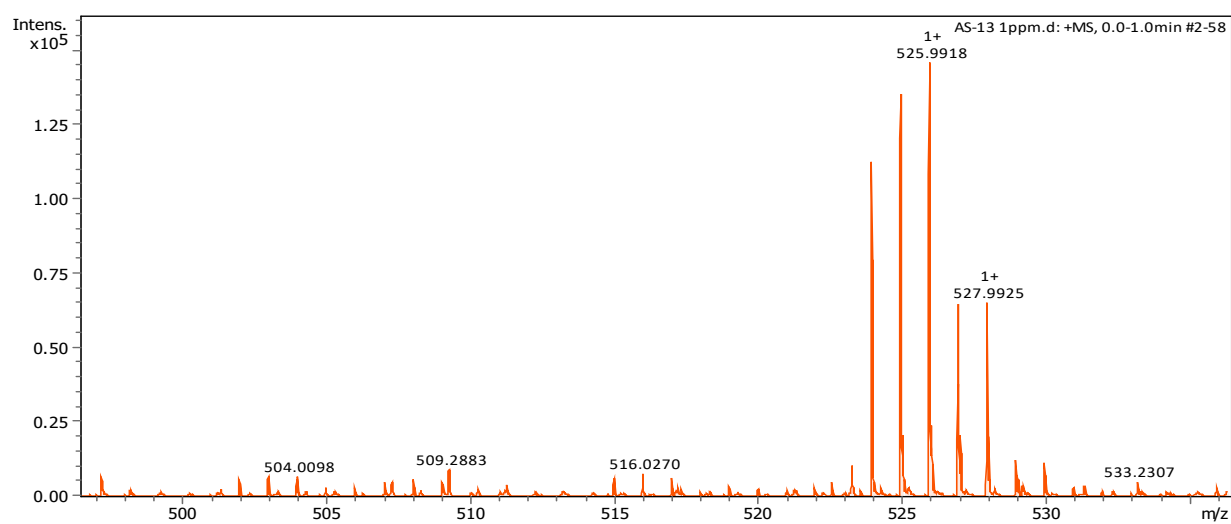

**Figure 46. Mass spectrum of Pt1**

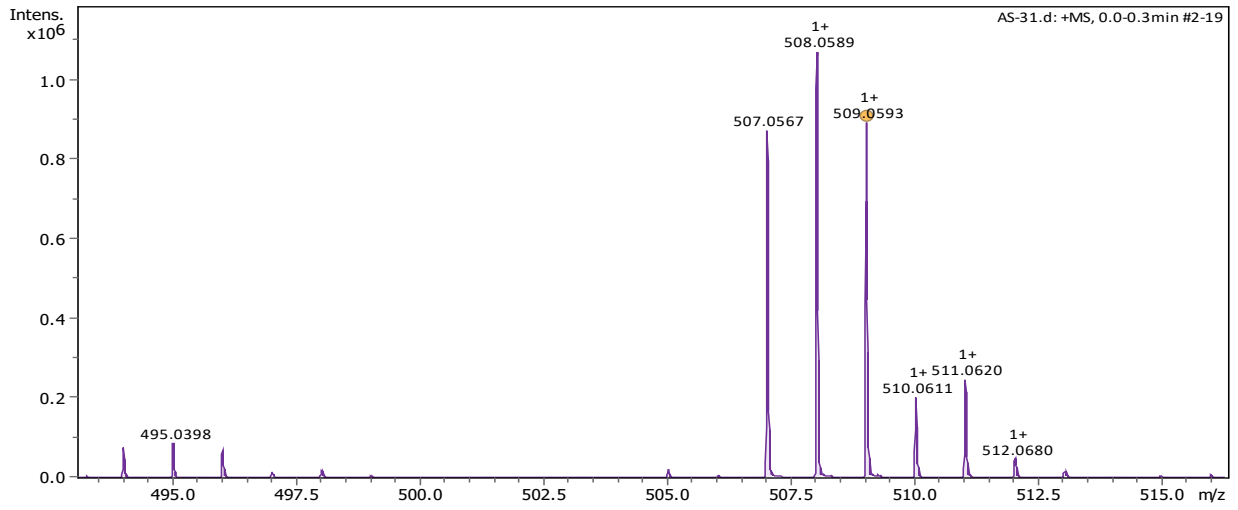

**Figure 47. Mass spectrum of Pt2**

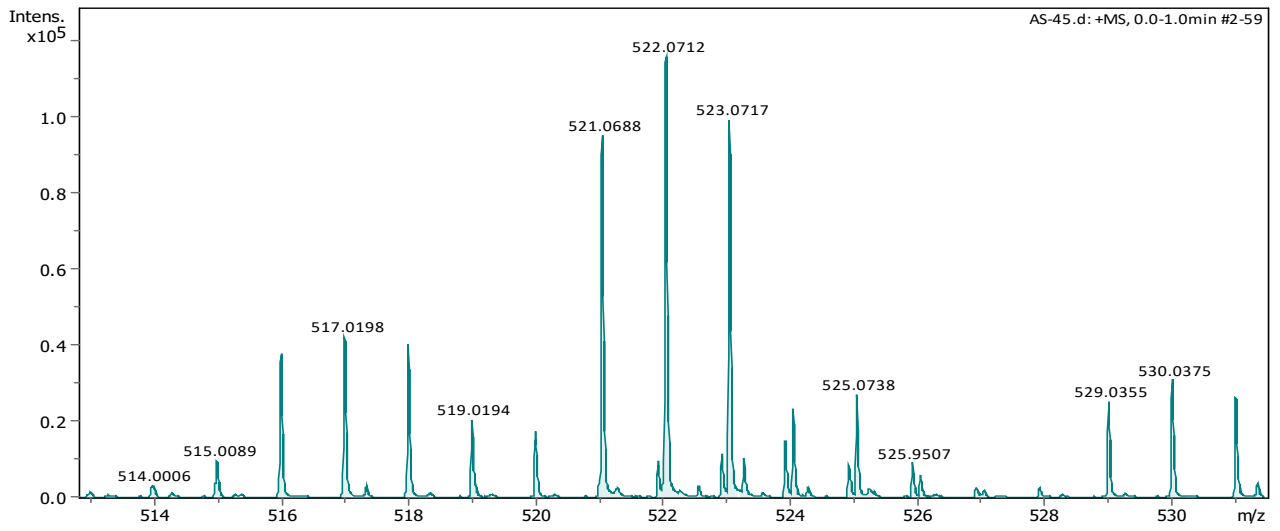

**Figure 48. Mass spectrum of Pt4**

**F**

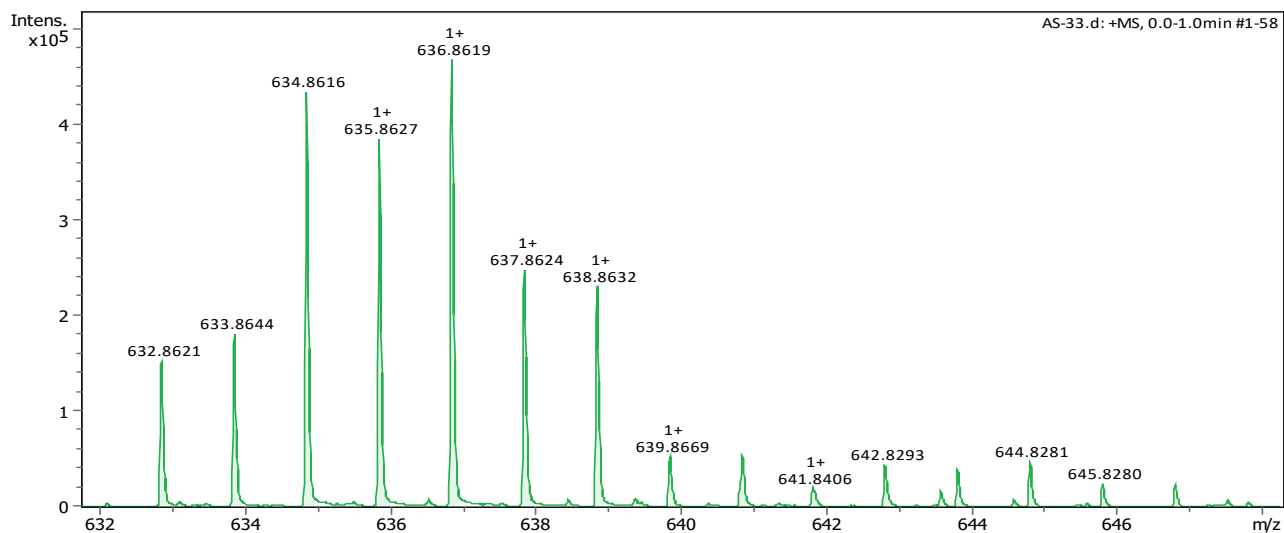

Figure 49. Mass spectrum of Pt5

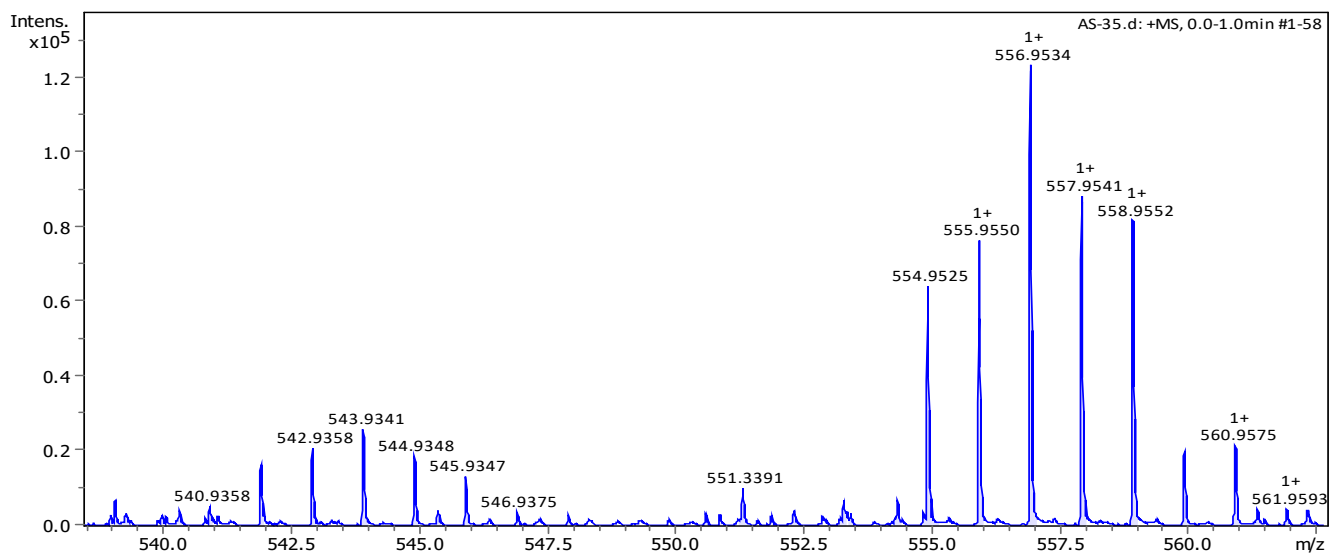

Figure 50. Mass spectrum of Pt6

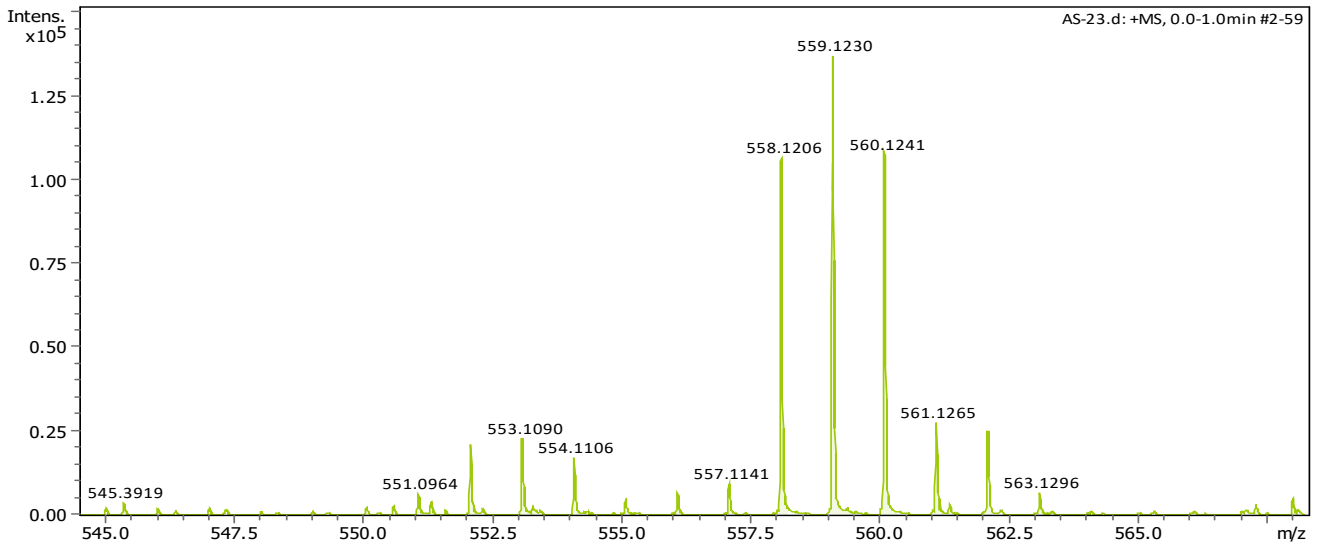

**Figure 51. Mass spectrum of Pt7**

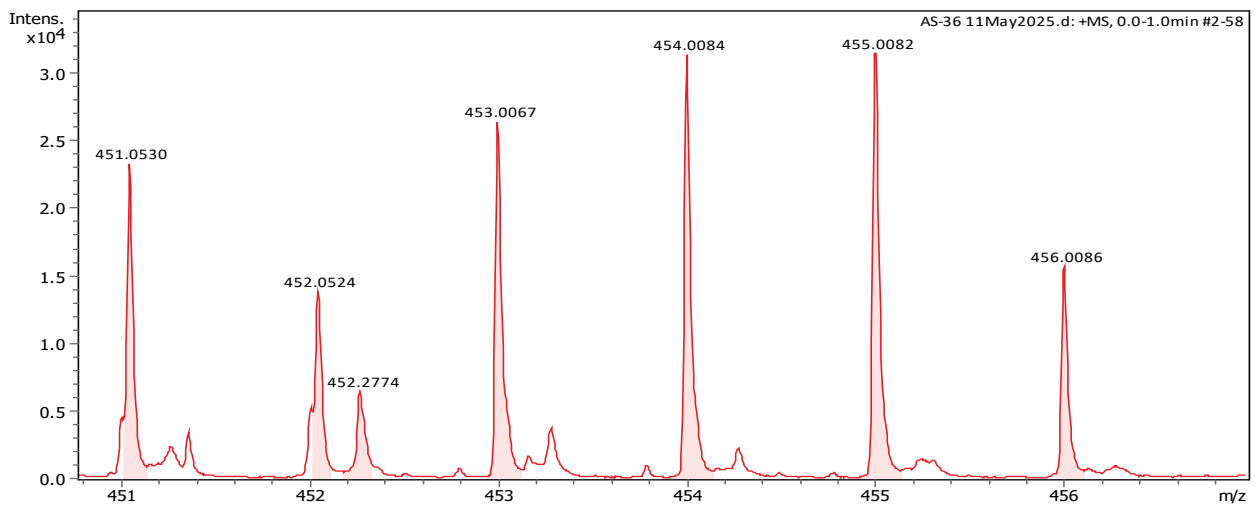

**Figure 52. Mass spectrum of Pt8**

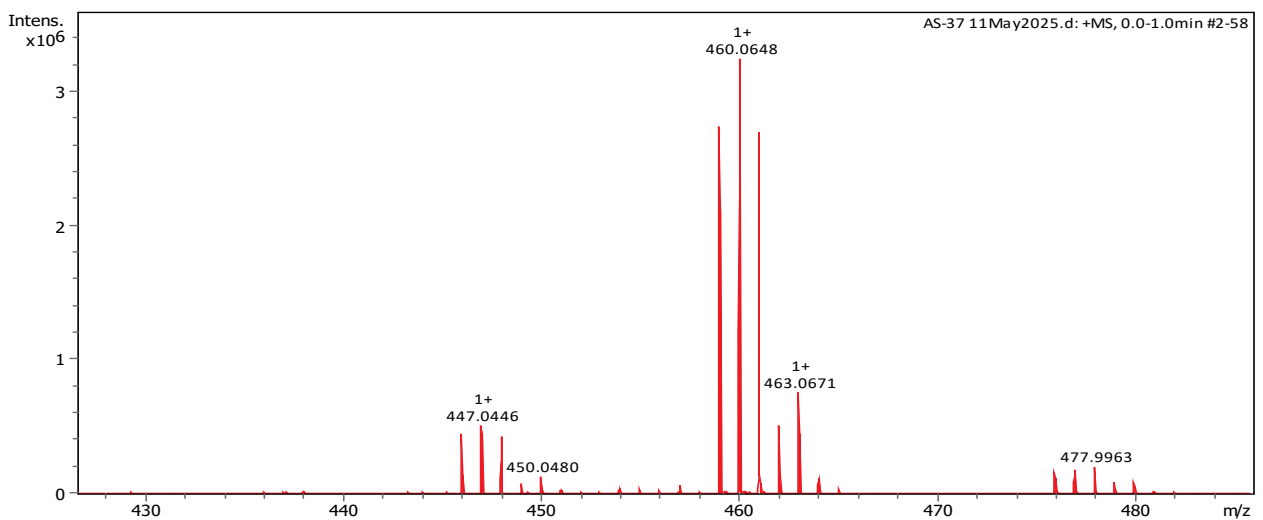

**Figure 53. Mass spectrum of Pt9**
